## 1 **Super-resolved live-cell imaging using Random Illumination Microscopy**

2

3 Thomas Mangeat<sup>1</sup>, Simon Labouesse<sup>2</sup>, Marc Allain<sup>2</sup>, Emmanuel Martin<sup>3</sup>, Renaud Poincloux<sup>4</sup>, Anaïs  
4 Bouissou<sup>4</sup>, Sylvain Cantaloube<sup>1</sup>, Elise Courtaux<sup>5</sup>, Elodie Vega<sup>4</sup>, Tong Li<sup>3</sup>, Aude Guérolé<sup>3</sup>, Christian  
5 Rouvière<sup>1</sup>, Sophie Allard<sup>6</sup>, Nathalie Campo<sup>5</sup>, Magali Suzanne<sup>3</sup>, Xiaobo Wang<sup>3</sup>, Grégoire Michaux<sup>7</sup>, Mathieu  
6 Pinot<sup>7</sup>, Roland Le Borgne<sup>7</sup>, Sylvie Tournier<sup>3</sup>, Jérôme Idier<sup>8</sup>, Anne Sentenac<sup>2</sup>

7 Corresponding author: [thomas.mangeat@univ-tlse3.fr](mailto:thomas.mangeat@univ-tlse3.fr),

8 Leading author: [anne.sentenac@fresnel.fr](mailto:anne.sentenac@fresnel.fr)

9

10 1. LITC Core Facility, Centre de Biologie Integrative, Université de Toulouse, CNRS, UPS, Toulouse,  
11 31062 France.

12 2. Institut Fresnel, Aix Marseille Univ, CNRS, Centrale Marseille, Marseille, France.

13 3. LBCMCP, Centre de Biologie Intégrative (CBI), Université de Toulouse, CNRS, UPS, Toulouse, 31062  
14 France.

15 4. Institut de Pharmacologie et de Biologie Structurale (IPBS), Université de Toulouse, CNRS, UPS,  
16 Toulouse, France.

17 5. Laboratoire de Microbiologie et Génétique Moléculaires (LMGM), UMR5100, Centre de Biologie  
18 Intégrative (CBI), CNRS, Toulouse, France.

19 6. INSERM Université de Toulouse, UPS, CNRS, Centre de Physiopathologie de Toulouse Purpan (CPTP),  
20 Toulouse, France.

21 7. Univ Rennes, CNRS, Institut de Génétique et Développement de Rennes (IGDR) - UMR 6290, 35000  
22 Rennes, France.

23 8. LS2N, CNRS UMR 6004, 1 rue de la Noë, F44321 Nantes Cedex 3, France.

24

25 **Summary**

26 Super-resolution fluorescence microscopy has been instrumental to progress in biology. Yet, the photo-  
27 induced toxicity, the loss of resolution into scattering samples or the complexity of the experimental setups  
28 curtail its general use for functional cell imaging. Here, we describe a new technology for tissue imaging  
29 reaching a 114nm/8Hz resolution at 30  $\mu\text{m}$  depth. Random Illumination Microscopy (RIM) consists in  
30 shining the sample with uncontrolled speckles and extracting a high-fidelity super-resolved image from the  
31 variance of the data using a reconstruction scheme accounting for the spatial correlation of the illuminations.  
32 Super-resolution unaffected by optical aberrations, undetectable phototoxicity, fast image acquisition rate and  
33 ease of use, altogether, make RIM ideally suited for functional live cell imaging *in situ*. RIM ability to image  
34 molecular and cellular processes in three dimensions and at high resolution is demonstrated in a wide range  
35 of biological situations such as the motion of Myosin II minifilaments in *Drosophila*.

36

37

38

## 39 **Introduction**

40 Cell biology began with the light microscope in the seventeenth century. Since then, optical microscopy has  
41 remained an essential tool for cell biologists: learning how cells function requires a detailed knowledge of  
42 their structural organization and of the dynamic interplay of their many constituents, often over extended  
43 periods of time. A decisive breakthrough in microscopy was the specific tagging of virtually any protein with  
44 a fluorescent probe to visualize its location, dynamics, and potential interactions with other partners in living  
45 cells. But imaging subcellular structures required improving the resolution beyond the diffraction barrier,  
46 about 300 nm, which limits widefield microscopes. Furthermore, reaching the highest resolution attainable  
47 while using the least possible light intensity to preserve live cell integrity raised two challenges that seemed  
48 to be mutually exclusive.

49 In the past two decades, the development of super-resolution fluorescence imaging techniques have been  
50 developed to break the diffraction limit, notably stimulated emission depletion (STED) (Hell and Wichmann,  
51 1994; Klar and Hell, 1999), stochastic optical reconstruction microscopy and photoactivated localization  
52 microscopy (STORM/PALM) (Betzig et al., 2006; Hess et al., 2006; Rust et al., 2006), or structured  
53 illumination microscopy (SIM) (Heintzmann and Cremer, 1999; Gustafsson, 2000; Gustafsson et al., 2008).  
54 These techniques and their later improved versions have provided impressive details of subcellular structures  
55 (for a review see Sahl et al., 2017). But each of them present caveats that limit their general use for live-cell  
56 imaging. Saturated fluorescence (STED), pointillists methods (STORM and PALM) and intrinsic  
57 fluorescence fluctuation approaches (Dertinger et al., 2009) reach their performance at the cost of intense  
58 light shining and/or prolonged data acquisition time that restrict imaging to small volumes of observation or  
59 slow temporal dynamics. Therefore, the vast majority of what is being looked at by super-resolution  
60 microscopy (SRM) is fixed cells with the possibility of sample distortions and artifacts induced by chemical  
61 treatments (Richter et al., 2017).

62 Currently, Structured illumination microscopy (SIM) presents the best compromise between spatial and  
63 temporal resolutions with low toxicity for live imaging. The SIM super-resolved image is formed  
64 numerically from several low-resolution images obtained for different positions and orientations of a  
65 periodic illumination pattern. The success of the numerical reconstruction relies on a precise knowledge of  
66 the illumination. When aberrations, possibly induced by the sample itself, distort the illumination pattern, the  
67 reconstruction fails. Thus, the best SIM resolution, about 120 nm transversally and 360 nm axially, is  
68 obtained with thin, transparent cell monolayers (Shao et al., 2011). Others versions of SIM have been  
69 introduced for imaging subcellular processes in thicker samples, but at a lower xyz resolution, 220 x 220 x  
70 370 nm for the lattice light sheet version (Chen et al., 2014; O'Shaughnessy et al., 2019), and about 160 x  
71 160 x 400 nm for the spot-scanning illumination (AiryScan) (Sivaguru et al., 2018).

72 Recently, it has been demonstrated theoretically (Idier et al., 2018) and experimentally (Mudry et al., 2012;  
73 Labouesse et al., 2017) that periodical or focused illumination in SIM could be replaced by totally  
74 uncontrolled speckles. Counter-intuitively, the low-resolution images obtained with unknown speckle  
75 illuminations could be processed into a sample image of better resolution than classical widefield  
76 microscopy. Potentially, speckle illumination appeared to be ideally suited for live cell imaging: ease of use

77 (no lengthy monitoring of experimental drifts, no time-consuming calibration protocols when changing the  
78 sample, objective or wavelength), widefield configuration, low levels of energy transfer to the samples and  
79 an extremely simple experimental setup. Yet, the resolution was too low for imaging subcellular dynamics.  
80 In the present work, we developed a technique based on speckle illumination, that we call Random  
81 Illumination Microscopy (RIM), which achieves a super-resolution level comparable to the best 3D periodic  
82 SIM, with the ease of use and application range of widefield microscopy. The gain of resolution was  
83 obtained using an original data processing combining the statistical approach of fluctuation microscopy with  
84 the demodulation principle of structured illumination microscopy. Most importantly, speckle illumination is  
85 insensitive to optical aberrations and scattering by thick specimens, and shows minimal phototoxicity,  
86 making RIM a method of choice for live-cell imaging *in situ*.  
87 RIM ability to visualize biological processes in 3D, at high resolution and over extended periods of time is  
88 demonstrated, in comparison with the best available imaging techniques, on a wide range of macromolecular  
89 complexes and subcellular structures in action, such as the Z-ring of dividing bacterial cells, the dynamic  
90 actin network of macrophage podosomes, the mobility of proliferating cell nuclear antigen (PCNA) during  
91 DNA replication, or kinetochore dynamics in mitotic *S. pombe* cells. Analysis of multicellular samples was  
92 illustrated by imaging the intestine microvilli of *C. elegans*, the 3D motion of myosin minifilaments within  
93 developing *Drosophila* tissues, or the collective invasive migration of border cells in fly ovary. These  
94 examples illustrate the wide range of possible applications of RIM for imaging live cell functions and related  
95 pathologies *in vivo*. The simplicity of RIM experimental setup and operation mode should hopefully  
96 democratize super-resolution microscopy, at low cost, in cell biology laboratories.

97

## 98 **Results**

99

### 100 ***Principle of RIM***

101 In RIM, a super-resolved reconstruction of the sample is formed numerically from several low-resolution  
102 images of the sample recorded under different uncontrolled speckle illuminations, hereafter named speckle  
103 images. A speckle is the light pattern formed by a coherent (laser) beam after the reflection or transmission  
104 by a random medium (Figure 1A). To implement RIM, a standard widefield epi-fluorescence microscope  
105 was modified by replacing the lamp with different laser diodes and introducing a Spatial Light Modulator  
106 (SLM), displaying random phase masks along the illumination path. Several hundreds of different speckles  
107 could be generated per second by changing the SLM display (Figure 1A-B; Movie S1).

108 The random bright grains of the speckle illumination, depicted in Figure 1A, ensure a quasi-pointillist  
109 excitation of the fluorescence, which connects RIM to the field of high-density fluctuation microscopy  
110 (dSTORM) (Baddeley et al., 2009), as illustrated in Figure 1B. Yet, in fluctuation microscopy, the excited  
111 fluorophores are sparser and appear at uncorrelated positions while in RIM they are excited collectively  
112 within the speckle bright grains over a typical distance of half a wavelength corresponding to the speckle  
113 correlation length. Due to this collective excitation, RIM requires significantly less images to cover the  
114 whole sample and a smaller integration time than fluctuation microscopy.

115 The super-resolved reconstruction is formed from the speckle images using a reconstruction scheme named  
116 AlgoRIM. AlgoRIM is based on a rigorous mathematical analysis (Idier et al., 2018) that takes advantage of  
117 the spatial correlation of the fluorophore excitation induced by the speckle to gain a two-fold increase in  
118 resolution. The fluorescence high frequency features are extracted from the variance of the raw images, as in  
119 fluctuation microscopy, through a demodulation process using the speckle autocorrelation as a carrier wave,  
120 as in Structured Illumination Microscopy. AlgoRIM does not invoke the sparsity of the excitation or the  
121 binarity of the fluorescence for achieving super-resolution and, even though it is based on the variance of the  
122 speckle images, it yields a linear response to brightness (for more details, see Supplemental information).

123 In Figure 1C, we compare the reconstructions of the same sample of tagged F-actin network in podosomes  
124 obtained by second-order statistics dSTORM (*NanoJ software, Super Resolution Radial Fluctuation*)  
125 (Gustafsson et al., 2016) and RIM. Podosomes are actin-rich, cell adhesion structures applying protrusive  
126 forces on the extra cellular environment, recently observed by 3D dSTORM (Bouissou et al., 2017).  
127 Remarkably, the RIM reconstruction showed more details than dSTORM at the level of podosomes nodes,  
128 and was closer to a Scanning Electron Microscopy (SEM) image of a similar sample. Importantly, RIM  
129 required ten times less images, used ten times less power and was two hundred time faster than dSTORM.

130 In Figure 1D, we compare the reconstructions and the raw images of the same sample of vinculin-tagged  
131 podosomes attached to the substrate obtained by RIM and SIM (by displaying either random or periodic  
132 masks on the SLM). The resolution and overall dynamic range of the two techniques are remarkably similar.

133 To evaluate more precisely the resolving power of RIM, we imaged a calibrated DNA nanoruler (SIM 140  
134 YBY), where two red fluorophores (Alexa 561) attached at the DNA ends are separated by 140 nm, and are  
135 equidistant (70 nm) to a green fluorophore (Alexa 488). In Figure 1E, we compare the RIM reconstruction to  
136 the SIM image given by the commercial two-color Zeiss SIM Elyra system. Figure 1E shows that both RIM  
137 and SIM succeeded in separating the red fluorophores and accurately located the green middle one. RIM  
138 resolution was the same of that of SIM with an average red-to-green distance of about 70 nm in both cases  
139 (compare the graphs in Figure 1E). Additional experiments with calibrated samples indicated that RIM  
140 resolution matched that of the best periodic SIM techniques, about 120 nm for fluorophores emitting at 514  
141 nm with an objective of NA=1.49 (Figures S1E and S3A).

142 In these types of experiment where the sample does not distort the illumination pattern, the major interest of  
143 RIM compared to SIM is the extreme simplicity of the experimental protocol which can be performed in less  
144 than ten minutes even for two-color imaging. Since the illumination patterns do not need to be known, the  
145 only tuning required before imaging consists in checking the focus. In contrast, in the case of SIM, the  
146 knowledge of the illumination patterns is mandatory, which implies a specific sample preparation and a  
147 precise microscope alignment and polarization control for the two colors, which, altogether, may take about  
148 two hours (Demmerle et al., 2017). Another interest of RIM, compared to SIM, is the robustness and ease-of-  
149 use of its inversion procedure. AlgoRIM required the tuning of 4 parameters, the widths of the observation  
150 point spread function and speckle correlation and two Tikhonov parameters (see Supplemental information),  
151 while at least 7 were needed for the SIM reconstruction procedure, in particular for recovering the

152 illumination patterns from the raw images. This last task is particularly delicate as it can be jeopardized by a  
153 too big difference between the excitation and fluorescence wavelengths (Figure S1F).

154

155

156

### 157 ***RIM allows high fidelity super-resolved imaging in three-dimensions***

158 RIM three-dimensional (3D) imaging is obtained by translating the sample through the focal plane (Movie  
159 S1) and by recording several speckle images at each position. The speckle illumination and the variance-  
160 based data processing ensure an efficient optical sectioning (Ventalon and Mertz, 2005 ; Ventalon et al,  
161 2007). Note that, when necessary, the spherical aberration induced by the index mismatch between the  
162 objective immersion oil and the mounting medium has been accounted for when reconstructing the 3D image  
163 (Sibarita, 2005).

164 To test the fidelity of the super-resolved images obtained with 3D RIM, we focused on dense filamentous  
165 structures. We imaged the vimentin network from fixed HUVEC cells and reconstructed the whole network  
166 from 200 speckles per slice, 12 slices and an axial step of 100 nm (see in Figure 2A the color-coded axial  
167 position of the filaments, and Movie S2). As seen in Figure 2B, RIM transverse resolution was much better  
168 than that of confocal microscopy and similar to that of STED microscopy, about 120 nm (with fluorophores  
169 emitting at 700 nm and a NA of 1.49). Interestingly, RIM reconstruction was free from common artefacts  
170 such as the disappearance or merging of filaments (Marsh et al, 2018) and it provided the same image as  
171 STED both in the dense and sparse regions of the sample. A total of 1 kW/cm<sup>2</sup>, five times less than that  
172 required for confocal microscopy, was delivered to the entire volume (30 μm x 30 μm field of view) in less  
173 than 3 seconds.

174 To further investigate the axial resolution, we tested the ability of RIM to resolve the cell division ring of the  
175 bacteria *Streptococcus pneumoniae*. Cells were labeled with fluorescent FtsZ, an homolog of tubulin that can  
176 polymerize and assemble into a ring, called the Z-ring, at the site where the septum forms during cell division.  
177 This ring whose diameter ranges from 0.3 to 0.9 μm depending on the division stage (Fleurie et al., 2014) is  
178 roughly perpendicular to the observation focal plane when the bacteria lies on the substrate, which makes it  
179 ideally suited for checking RIM axial resolution. Z-rings were imaged in live bacterial cells transferred in  
180 minimum medium using 3D-PALM or RIM (Figure 2C). When comparing RIM and PALM images, note that  
181 the FtsZ protein was tagged differently to allow for the specific requirements of PALM. This may affect  
182 differently the level of expression of FtsZ and the efficiency of Z-ring formation. RIM image reconstructions  
183 clearly revealed the heterogeneous structure of Z-rings formed of discontinuous clusters of FtsZ protein, with  
184 highly different levels of fluorescence intensity, though at a lesser resolution than PALM equipped with  
185 adaptive optics (Zheng et al., 2017). Interestingly, in the transverse cut at the equatorial plane of a late  
186 dividing cell, significant levels of FtsZ protein were observed in-between the two nascent Z-rings on each  
187 side of the central ring that disassembles as it constricts, suggesting a constant exchange of free and ring-  
188 associated FtsZ molecules. The resolution of RIM was estimated to be 120 nm transversally and 300 nm  
189 axially, which is equivalent to that of the best SIM (Fleurie et al., 2014).

190

191 ***RIM provides super-resolved movies of live specimens at high temporal resolution and low toxicity.***

192 To optimize the temporal resolution of RIM and limit phototoxicity, one should know the minimal number of  
193 raw speckle images that is necessary for a faithful reconstruction of a given specimen. The latter depends on  
194 the nature of sample (dense or sparse) and its dynamics. Tests on fixed samples showed that super-resolved  
195 images can be obtained with only 50 speckles but at the cost of a residual illumination inhomogeneity  
196 (Figure S3A). Increasing the number of speckles improves the illumination homogeneity and the signal to  
197 noise ratio but movements of the live specimen during the recording may blur the reconstruction (Figure  
198 S3B). The speckle images being recorded regularly during the observation time, different trade-offs can be  
199 tested with the same data set. In addition to a classical processing in which the total number of speckle  
200 images recorded during the experiment,  $T$ , is divided into stacks of  $N$  speckle-images for forming  $T/N$  super-  
201 resolved reconstructions, we considered an interleaved reconstruction scheme in which the stacks of  $N$   
202 speckle images are shifted by  $Q$  images (with  $Q < N$ ) to form  $T/Q$  super-resolved reconstructions as illustrated  
203 in Figure 3B. The interleaved strategy permitted to improve the temporal resolution (by diminishing  $Q$ )  
204 while keeping a good signal to noise ratio and illumination homogeneity (using large enough  $N$ ). The  
205 optimal choice of  $Q$  and  $N$  may vary depending on the sample.

206 To illustrate the different reconstruction strategies, we imaged the dense actin network of podosomes from  
207 human macrophages under live conditions (Figure 3A and Movie S3). Podosomes are composed of an  
208 approximately 500 nm high and large F-actin protrusive core surrounded by an adhesion ring. The  
209 observation of their continuous spatial reorganisation requires super-resolved imaging over tens of minutes  
210 with a sub-second temporal resolution.

211 The compromise for imaging podosomes was to use stacks of 200 speckle-images in the classical  
212 reconstruction scheme (Figure S3C, Movie S3). We also implemented the interleaved strategy where stacks  
213 of 800 speckle images shifted by 200 to 10 images were used to form movies with temporal resolutions from  
214 2.4 s to 0.12 s (Figure S3D, Movie S3). The 120 nm resolution of the RIM movie revealed actin filaments  
215 linking two actin cores, in agreement with observations by electron microscopy (Figure 3B). The robust  
216 estimation of podosome surpassed that obtained with live-SIM (van den Dries et al., 2019; Meddens et al.,  
217 2016) or other computational methods (Marsh et al., 2018). Notably, the photobleaching and toxicity of RIM  
218 was comparable to that of SIM (Figure S4D) and podosome dynamics could be observed during 20 min  
219 without detectable alteration of their reorganization.

220 A second example was the dynamics of the Proliferating Cell Nuclear Antigen (PCNA) (Figure 3C and  
221 Movie S4). PCNA is a protein involved in DNA replication, DNA repair, chromatin remodeling, and cell  
222 cycle. Here, the temporal resolution needs were higher, but the sparsity of the sample allowed us to use only  
223 150 speckles in an interleaved reconstruction strategy yielding a temporal resolution of 0.12 s. The  
224 nanoclusters of PCNA were similar to those observed in fixed samples (Zessin et al., 2016). The trajectories  
225 of individual spots of PCNA were recorded during 20 s during the S phase of U2OS cells (Figure 3C, 3D and  
226 Movie S4). PCNA clusters mobility exhibited a fast and a slow diffusion regime, suggesting the existence of  
227 at least two pools of PCNA molecules probably belonging to different functional macromolecular complexes.

228 The average confinement distance of the slow replication clusters was about 120 nm while the fast diffusing  
229 PCNA clusters had a confinement about 200-300 nm (Figure 3E). These global results are in agreement with  
230 those previously obtained by single-particle tracking (Zessin et al., 2016). This experiment demonstrates the  
231 versatility of RIM, which, from the same set of data, provides both super-resolved images of the whole cell  
232 nucleus at all the phases of DNA replication and a trajectory analysis of PCNA similar to that obtained by  
233 single-particle tracking.

234 To illustrate the three-dimensional imaging potential and low toxicity of RIM, the mitosis of the fission  
235 yeast *Schizosaccharomyces pombe* was recorded in a 3D movie with a temporal resolution of 20 s (Movie  
236 S5). *S. pombe* is a rod-shaped, symmetrically dividing eukaryotic cell that splits by medial fission. *S.*  
237 *pombe* possesses three chromosomes which can be tracked by live imaging during mitotic progression.  
238 Mitotic chromosomes are captured by microtubules at kinetochores, which are giant protein complexes  
239 assembled at the centromere of each sister chromatids. Kinetochores, fluorescently labelled on the Ncp80  
240 protein, begin to align at the spindle center in phase 1 (spindle size of about 0.5 $\mu$ m; Mary et al., 2015).  
241 Remarkably, RIM imaging was able to visualize in xyz the 6 kinetochores attached to the three sets of sister  
242 chromatids in pro-metaphase (Figure 3G). In phase 2, the spindle retained roughly the same length, and the  
243 kinetochores oscillated between the two spindle pole bodies. In telophase, it was possible to observe the 3  
244 kinetochores moving at each cell pole (Figure 3G). Importantly, this level of kinetochore resolution in live  
245 fission yeast cells has never been attained in the past. We also noted that the metaphase to anaphase duration  
246 under RIM illumination (4 min) was as expected (Figure 3H, Movie S5) indicating that the cells were not  
247 detectably stressed by the repeated speckle illuminations.

248

#### 249 ***RIM super-resolved imaging of optically aberrant and scattering tissues***

250 A major bottleneck of a super-resolution imaging technique is its ability to keep its resolution level in  
251 optically aberrant or scattering environments.

252 We used *C. elegans* as a model multicellular organism to test RIM performance for imaging complex tissues  
253 like the worm intestine. A very high numerical aperture (TIRF objective with NA= 1.49) was selected for  
254 reaching the best possible resolution. In this configuration, aberrations are important due to the optical index  
255 mismatch between the worm and the mounting medium and the aberrations of the objective itself. In spite of  
256 this, RIM could image fluorescent ERM-1/ezrin, a protein constitutive of microvilli (microvilli are  
257 membrane protrusions that increase the surface area) and could clearly reveal the periodic organization of the  
258 intestine of living L4 larvae, at 15  $\mu$ m depth (Figure 4A). The periodicity of microvilli was about 120 nm  
259 (Figure 4C) as confirmed by TEM images (Figure 4B).

260 In a second example, the tagged regulatory light chain of the non-muscle Myosin II motor protein, spaghetti  
261 squash (sqh), was imaged in a fixed developing leg of the fly *Drosophila melanogaster* (Figure 4D).  
262 Non-muscle Myosin II (thereafter referred to as Myosin II) is the major molecular motor generating  
263 contractile forces within non-muscle cells. The developing leg is a tissue 110  $\mu$ m deep composed of a  
264 cylindrical columnar epithelium surrounded by a thin squamous epithelium (inset Figure 4D and Figure  
265 S4B). We tested RIM ability to produce super-resolution 3D images of Sqh-RFP in different regions of the



266 apical plane of the columnar epithelial cells (Figure 4D). The squamous epithelium and the presence of  
267 numerous interstitial lipid droplets were important source of scattering and aberrations which made imaging  
268 difficult. Hence, this sample could not be imaged with periodic SIM because of the frequent disappearance  
269 of the illumination grid (see Figure S4C and Movie S6). The RIM images were thus compared to that  
270 obtained with the more robust focused scanning SIM known commercially as AiryScan. RIM images were  
271 better resolved than that of AiryScan (Figure 4E-F, Movie S7), and Fourier Ring Correlation (FRC)  
272 (Banterle et al., 2013) estimated a 113 nm Fourier Image Resolution (FIRE) resolution (Nieuwenhuizen et  
273 al., 2013) for RIM compared to 189 nm FIRE for AiryScan. This difference in resolution enabled RIM to  
274 distinguish the myosin dots aligned on the actin cortical networks of the cells. Imaging over a field of view  
275 of 110  $\mu\text{m}$  x 110  $\mu\text{m}$  required 0.4 s for RIM and 4.3 s for AiryScan. In addition, a careful investigation on  
276 several samples showed that, for the same energy (4 mJ) injected per voxel, RIM induced significantly less  
277 bleaching than AiryScan (Figure S4D).

278

### 279 ***RIM multiscale imaging, from molecular motion to cell migration***

280 To investigate the ability of RIM to visualize macromolecular motions deep inside several living tissues, we  
281 focused on Myosin II dynamics. Non-muscle Myosin II molecules are heterohexamers composed of two  
282 heavy chains, two regulatory light chains (Sqh), and two essential light chains. Myosin II hexamers assemble  
283 in an antiparallel manner to form 300 nm long minifilaments, comprising about 15 Myosin II dimers, that  
284 can be labeled at both ends with Sqh-RFP, forming a characteristic fluorescent doublet (Figure 5A), (Hu et  
285 al, 2017). Up to now, doublets of Myosin II minifilaments have only been observed in cultured cells (Beach  
286 et al, 2014 ; Fenix et al., 2016 ; Hu et al., 2017 ). In this work, we imaged Myosin II in different live  
287 *Drosophila* epithelia. Epithelial cells harbor three main pools of Myosin II, (Figure 5B II), two located  
288 apically called the junctional Myosin II accumulating at cell-cell adhesive contacts and the medial myosin  
289 inside the cell. A third pool is located basally at focal adhesion, and faces the basement membrane.

290 We first imaged the basal plane of follicular epithelial cells (FEC) of *Drosophila* egg chamber at stage 9  
291 where the imaging conditions, 1 $\mu\text{m}$  deep from the coverslip, are benign (Figure S5A-B). Myosin II filaments  
292 are organized in parallel bundles lying along actin filaments (Figure S5F) (He et al., 2010). Aligned  
293 fluorescent spots of Myosin II (Sqh-RFP) were well observed in the RIM widefield view (Figure S5C taken  
294 from Movie S8) and their motion, correlated by pair, confirmed their doublet nature (Figure S5D). In Figure  
295 S5E, two-color RIM imaged labeled Myosin II (Sqh-RFP) together with labeled Actin (Utrophin-ABD-GFP)  
296 and disclosed the interpenetration and alignment of Myosin and Actin filaments as expected (see the high  
297 magnifications in S5E, II and III).

298 For challenging the ability of RIM to visualize Myosin II molecular motion deep into a complex living  
299 tissue, we turned to the developing *Drosophila* leg whose imaging difficulty has already been pointed out in  
300 Figure 4D. Figure 5C shows a RIM 3D widefield view of the Myosin II (Sqh-RFP) network at the apical  
301 plane, 8  $\mu\text{m}$  deep inside the live developing leg. RIM successfully visualized the pool of Myosin II  
302 concentrated at cell-cell contacts (junctional Myosin II). A zoom on this junctional Myosin revealed the  
303 distinctive spots corresponding to Myosin heads and showed the ability of RIM to follow the 3D motion of a

304 single minifilament during 20 seconds (Figure 5D), independently of its orientation in the xyz directions  
305 (Figure 5F). Remarkably, single minifilaments could also be imaged at the basal plane of the epithelial cell,  
306 at 30  $\mu\text{m}$  depth, despite the optically aberrant environment (Figure 5E). To our knowledge, no other imaging  
307 technique could follow, at such depths within a live tissue, the 3D displacement of myosin with such a  
308 resolution.

309 For a global functional analysis of Myosin II dynamics, taking advantage of the high spatio-temporal  
310 resolution of 3D RIM, we looked at the dorsal thorax of *Drosophila* pupal notum epithelium (Figure 6A). It  
311 is a single layer epithelium composed of epidermal cells and sensory organ precursor cells (SOP). Figure 6C  
312 shows a 3D RIM widefield view of the Myosin II networks at the apical plane, 7  $\mu\text{m}$  from the coverslip. RIM  
313 clearly detected the two distinct pools of Myosin II, the medial Myosin II forming irregular networks inside  
314 the cells, and the junctional Myosin II accumulating neatly at cell-cell contacts. Each cell having its own  
315 pool of junctional Myosin II at the adhesive contacts, the 3D RIM image shows two parallel dotted lines  
316 corresponding to minifilaments myosin heads, not regularly spaced though in contrast to some previous  
317 observations on other fixed epithelial cells (Ebrahim, 2013). The fluorescence intensity plot between these  
318 two junctional myosin layers (red arrowheads in Figure 6C) indicates a 130 nm resolution. Even though this  
319 type of tissue was highly optically heterogeneous, as schematically presented in Figure 6A, the resolution  
320 remained constant (130 nm) over the whole field of view and was able to distinguish the Myosin filament  
321 fluorescent doublets (see Movie S8). Remarkably, RIM high temporal resolution was able to visualize the  
322 pulses of the medial Myosin II networks in a constant state of spatial reorganization (Martin et al., 2009)  
323 (Figure 6D, Movie S8). RIM was also able to visualize the flow of junctional myosin II at the cell cortex  
324 (Rauzi et al., 2010) (Figure 6E, Movie S8).

325 In Figure 6C, we noted that the 3D image reconstruction of medial Myosin II network was rather uniformly  
326 colored. This observation suggested that apical myosin is spatially restricted to a small section (about 300 nm  
327 thick) of the epidermal cells (see the color scale bar). In line with this conclusion, transmission electron  
328 microscopy images on sections along the apical-basal axis, showed that the thickness of the adhesive cell-  
329 cell contact, was of only 300 nm (Figure 6B part I), which corresponds well to the Myosin II belt previously  
330 described (Ebrahim et al., 2013). RIM high axial resolution was also illustrated in Figure 6F where it  
331 elegantly allowed to discriminate the lower apical positioning and larger thickness of the Myosin II networks  
332 of sensory organ precursor cells compared to that of surrounding epidermal cells: at  $Z=0$  nm up to  $Z=600$   
333 nm Myosin medial network was well observed in SOP cells, while medial Myosin of the neighboring  
334 epidermal cells, barely detectable at  $Z=200$  nm, was well observed at  $Z=400$  nm and  $Z=600$  nm. These  
335 observations, summarized in the cartoon Figure 6B, come at variance with a previous conclusion that Myosin  
336 II was mostly junctional in neighboring non-SOP cells (Couturier et al., 2017).

337 The above results underscored the versatility of RIM for imaging a variety of tissues from large fields of  
338 views to macromolecular motion. In the following experiment, we show that RIM can also help visualizing  
339 large scale cell movements. We chose to focus on a process of collective cell migration occurring deep in a  
340 tissue, the migration of border cells in *Drosophila* ovary labeled on F-actin by UtrABD-GFP. At stage 9,  
341 these border cells perform an invasive migration on the intervening nurse cells to finally reach the oocyte at

342 stage 10. A 75 min movie (Movie S9) shows, with a constant image quality, the migration of border cells  
343 from the anterior epithelial surface to the center, 60 microns deep, of the egg chamber. In addition to the  
344 super-resolved reconstructions, classical widefield images were obtained by simply summing the speckle  
345 frames as proposed in (Mudry et al, 2012). The widefield images, which resemble transmission-microscopy  
346 images thanks to the out-of-focus fluorescence (Shain et al., 2017), permit to locate the migrating cells in its  
347 complex environment (Figure 7A). The migration process was clearly unaffected by the 200,000 speckles  
348 illumination. Remarkably, a constant transverse resolution was obtained, whatever the position of the cells.  
349 At the end of the migration, close to the oocyte, the resolution was still about 160 nm (Figure 7B).  
350 Altogether, these data demonstrate the ability of RIM to image deep inside living tissues, with high  
351 resolution and no apparent toxicity.

352

### 353 **Discussion**

354 RIM is a simple live-cell imaging technique, based on speckle illumination of the samples, that combines  
355 super-resolution, robustness to aberration and scattering, low toxicity, and good temporal resolution which,  
356 altogether, makes it particularly suited for imaging intracellular dynamics from molecular motion to  
357 collective cell migration in thick specimens.

358

#### 359 *Simplicity of implementation and ease of use of RIM*

360 The first asset of RIM is the simplicity of its implementation. RIM provides a super-resolved reconstruction  
361 of the sample from a set of low-resolution images recorded under different uncontrolled speckles. Any  
362 widefield microscope can be adapted to RIM by replacing the lamp by a laser and introducing a diffuser on  
363 the illumination path to form the speckles. The knowledge of the illumination patterns being unnecessary,  
364 RIM tuning protocol is similar to that of classical widefield microscopy. Multicolor imaging requires only  
365 multilaser excitation and appropriate filtering as in widefield microscopy (Figures 1 and S5).

366

#### 367 *Super-resolution and fidelity to the true fluorescence*

368 The second asset of RIM lays in its original inversion scheme, algoRIM, which yields reconstructions true to  
369 the actual fluorescence dynamic range with a resolution of 120 nm transversally and 300 nm axially,  
370 matching that of the best 3D SIM (Figures 1, 2, S1 and S2).

371 The super-resolution achieved by RIM can be explained on theoretical grounds. A mathematical study has  
372 demonstrated that a twice-better super-resolved sample reconstruction could be theoretically obtained from  
373 the covariance of the speckle images provided that the Fourier supports of the speckle autocorrelation and  
374 observation point spread function are similar (Idier et al., 2018; summarized in Supplemental information).  
375 In practice, each speckle image is deconvolved using a Wiener filter to reduce the width of the point spread  
376 function and the statistic noise. Then, the variance of the speckle images is formed. Last, the fluorescence is  
377 estimated iteratively so as to minimize the distance between the rigorous model of the variance accounting  
378 for the speckle autocorrelation, and the empirical variance (see Supplemental information). This critical  
379 inversion step restores the fluorescence dynamic range and improves significantly the resolution compared to

380 the process consisting in taking the standard deviation of the deconvolved speckle images (Taylor et al.,  
381 2018; Ventalon et al, 2007) (Figure S1E). Importantly, the reconstruction scheme does not use any  
382 regularisation except for the one needed for stabilizing the solution with respect to noise. As a result,  
383 algoRIM is successful on both dense and sparse fluorescent samples and avoids the common artefacts  
384 encountered in fluctuation or sparsity-based microscopy such as the over or underestimation of strongly or  
385 weakly labelled features (Marsh et al, 2018). Hence, as compared with the SEM image, RIM showed more  
386 details than dSTORM of the densely fluorescent podosome nodes (Figure 1C), and when the same vimentin  
387 filaments were observed by RIM or by STED microscopy, the same image was obtained at the same  
388 resolution (Figure 2B), which underscored the fidelity of RIM image reconstruction.

389

### 390 ***Robustness to aberrations and scattering***

391 To provide super-resolved reconstructions, the inversion procedure of RIM requires data with sufficient  
392 signal to noise ratio and a model for the point spread function and the speckle autocorrelation. Contrary to  
393 SIM, RIM is not affected by the illumination deformations induced by the sample, the lens imperfections or  
394 the experimental drifts as the speckle autocorrelation is insensitive to aberration or scattering (Goodman,  
395 2007). Moreover, the speckle dynamic range being much larger than the dynamic range of periodic grids,  
396 RIM images are more contrasted than SIM images and less affected by the background noise as seen in  
397 Figure 1D. As a result, RIM provided super-resolved reconstructions in conditions where SIM failed (Figure  
398 S4C, MovieS6). Moreover, the transverse resolution, about 120 nm, could be maintained over large fields of  
399 view (100  $\mu\text{m}$  x 100  $\mu\text{m}$ ) and over extended periods of time (more than an hour) (Figures 6 and 7 and Movie  
400 S9). To our knowledge, such a constancy of performance in space and time when observing thick live  
401 samples has only been obtained (though at a lower transverse resolution of about 230 nm) with a lattice light  
402 sheet microscope equipped with adaptive optics on both the illumination and observation paths to minimize  
403 specimen-induced optical aberrations (Liu et al., 2018). The unique combination of super-resolution and  
404 resistance to aberrations of RIM was demonstrated in a spectacular way by the visualization of Myosin II  
405 minifilaments motion deep inside (30  $\mu\text{m}$ ) a developing *Drosophila* leg (Figure 5). Previously, minifilaments  
406 had only been observed in cultured cells, never in thick living tissues (Fenix et al., 2016; Hu et al., 2017).

407

### 408 ***Low toxicity***

409 RIM phototoxicity level was clearly compatible with functional imaging: it did not detectably affect the  
410 podosomes reorganization during 20 min recording time (Figure 3), nor the collective migration of border  
411 cells during 75 min (Figure 7, Movie S9). Most remarkably, RIM did not alter the highly stress-sensitive  
412 mitosis duration in *S. pombe* when imaging kinetochore motion from prophase to telophase (Figure 3).

413

### 414 ***Temporal resolution***

415 Temporal resolution is a weak point of all super-resolution microscopy methods, especially when large fields  
416 of view are required. In this work, the temporal resolution of RIM was essentially limited by the read-out  
417 time and electronic noise of the camera. An important feature of RIM is that the number of speckle images

418 used for forming one super-resolved image can be adapted to the sample dynamics after the recording: from  
419 the same data set, corresponding to thousands of speckle frames recorded every 12 ms, one can derive  
420 different movies of increasing temporal resolution, though at the cost of a deteriorated illumination  
421 homogeneity. In practice, 150 speckles were sufficient to observe the sparse and fast moving PCNA (Figure  
422 3C). In addition, the exchangeable role of each individual speckle frame makes RIM particularly well  
423 adapted to interleaved reconstruction. Hence, shifting sets of 800 speckles by 10 speckles provided a  
424 seemingly continuous sliding of myosin molecules at a temporal resolution of 120 ms (Movie S8).

425

#### 426 ***Which perspectives?***

427 RIM combines the key advantages of SIM such as super-resolution, low toxicity, good temporal resolution,  
428 no need for specific fluorophores, but with the unrivalled ease of use of widefield fluorescence microscopy  
429 and the ability to image deep into samples without sophisticated adaptive optics. Of course, there is room for  
430 improvements. Hence, faster cameras with continuously improving data acquisition rate, multifocus  
431 techniques to record several planes of the sample simultaneously (Abrahamsson et al., 2013) as well as the  
432 use of complementary speckle sequences (Gateau et al., 2017) for reaching the illumination homogeneity  
433 faster, should ameliorate the temporal resolution. The development of fluorophores that emit at wavelengths  
434 much larger than the excitation should alleviate the deformation of the observation point spread function to  
435 probe even deeper into the sample. There is also the possibility to modify the nature of the speckle and of the  
436 excitation to further improve the resolution (Labouesse et al., 2017, Negash et al. 2018).

437 To conclude, we believe that RIM will fill the expectations of cell biology laboratories, in line with the  
438 growing need for simple, fast, super-resolved functional imaging of live-cells within normal or pathological  
439 tissues or model organisms. It is worth noting that the mathematical concepts of RIM applies to all imaging  
440 techniques in which the recorded data are linearly linked to the sought parameter times an excitation field.  
441 Ultrasound imaging, diffraction microscopy, microwave scanning, photo-acoustic imaging among others,  
442 could benefit from the philosophy of this novel approach.

443

#### 444 **Acknowledgements**

445 We thank François Payre, Paul Mangeat and Malek Djabali for proofreading the manuscript. We thank the  
446 Imaging Core TRI and Drosophila facilities of the CBI, and Isabelle Fourqueaux (CMEAB) for SEM  
447 imaging. We thank INSERM Plan Cancer 2014-2019 and Toulouse Cancer Foundation for partial financial  
448 support. We thank David Villa for video editing (<https://www.scienceimage.fr/>).

449

#### 450 **Author contributions**

451 T.M., S.L., M.A., J.I. and A.S. conceived the project. A.S., M.A., S.L., and J.I. elaborated the theoretical RIM  
452 concept. S.L. developed and implemented the reconstruction method algoRIM. T.M. adapted algoRIM to the  
453 experimental dataset and made all RIM reconstructions, figures and movies. T.M. and T.L. implemented and  
454 automatized the RIM experiment. T.M. analysed the data with the help of all other authors. R.P., and A.B.  
455 prepared macrophages and provided the SEM images of podosomes and the high-density STORM raw

456 images which were processed by T.M. G.M. prepared the *C. elegans* and provided its EM image. E.M. and  
457 T.M. designed the *Drosophila* leg experiments using SIM, RIM and Airyscan. M.S., R.L.B., and X.W.  
458 supervised the molecular stainings of non-muscle Myosin II in the *Drosophila*. T.M., M.P., and R.L.B. did  
459 the RIM and EM imaging of the *Drosophila* pupal notum. E.V. provided the SIM images from Elyra Zeiss.  
460 S.A., and C.R. performed the STED images of vimentin in HUVEC cells. S.C., N.C. and E.C. provided the  
461 3D PALM images of *S. pneumoniae*. A.G. made the U2OS cell lineage and PCNA staining for RIM live  
462 imaging. C.R. made the *S. pombe* cell lineage for kinetochore RIM imaging. X.W. supervised the strain and  
463 sample preparation of *Drosophila* ovary for border cells migration experiments. A.S. and T.M. wrote the  
464 manuscript. All authors discussed the results and commented on the manuscript.

465

466 **Declaration of interests**

467 AlgoRIM described herein is covered by a provisional invention statement filed by S.L., T.M., J.I., M.A.,  
468 and A.S. and covered by the CNRS.

## References

- Abrahamsson, S., Chen, J., Hajj, B., Stallinga, S., Katsov, A.Y., Wisniewski, J., Mizuguchi, G., Soule, P., Mueller, F., Darzacq, X., et al. (2013). Fast multicolor 3D imaging using aberration-corrected multifocus microscopy. *Nat. Methods* 10, 60-63.
- Ayuk, R., Giovannini, H., Jost, A., Mudry, E., Girard, J., Mangeat, T., Sandeau, N., Heintzmann, R., Wicker, K., Belkebir, K., et al. (2013). Structured illumination fluorescence microscopy with distorted excitations using a filtered blind-SIM algorithm. *Opt. Lett.* 38, 4723-4726.
- Baddeley, D., Jayasinghe, I.D., Cremer, C., Cannell, M.B., and Soeller, C. (2009). Light-induced dark states of organic fluorochromes enable 30 nm resolution imaging in standard media. *Biophys. J.* 96, L22-L24.
- Ball, G., Demmerle, J., Kaufmann, R., Davis, I., Dobbie, I.M., and Schermelleh, L. (2015). SIMcheck: A toolbox for successful super-resolution structured illumination microscopy. *Sci Rep* 5: 15915.
- Banterle, N., Bui, K.H., Lemke, E.A., and Beck, M. (2013). Fourier ring correlation as a resolution criterion for super-resolution microscopy. *J. Struct. Biol.* 183, 363–367.
- Beach, J.R., Shao, L., Remmert, K., Li, D., Betzig, E., and Hammer, J.A. (2014). Nonmuscle myosin II isoforms coassemble in living cells. *Curr. Biol.* 24, 1160-1166.
- Bergé, M.J., Mercy, C., Mortier-Barrière, I., Vannieuwenhze, M.S., Brun, Y. V., Grangeasse, C., Polard, P., and Campo, N. (2017). A programmed cell division delay preserves genome integrity during natural genetic transformation in *Streptococcus pneumoniae*. *Nat. Commun.* 8:1621.
- Bertero, M. (1998). Introduction to inverse problem in imaging, Taylor and Francis Group, CRC press, Boca Raton.
- Betzig, E., Patterson, G.H., Sougrat, R., Lindwasser, O.W., Olenych, S., Bonifacino, J.S., Davidson, M.W., Lippincott-Schwartz, J., and Hess, H.F. (2006). Imaging intracellular fluorescent proteins at nanometer resolution. *Science* 313, 1642-1645.
- Bouissou, A., Proag, A., Bourg, N., Pingris, K., Cabriel, C., Balor, S., Mangeat, T., Thibault, C., Vieu, C., Dupuis, G., et al. (2017). Podosome Force Generation Machinery: A Local Balance between Protrusion at the Core and Traction at the Ring. *ACS Nano* 11, 4028–4040.
- Brenner, S. (1974). The genetics of *Caenorhabditis elegans*. *Genetics* 77, 71-94.
- De Chaumont, F., Dallongeville, S., Chenouard, N., Hervé, N., Pop, S., Provoost, T., Meas-Yedid, V., Pankajakshan, P., Lecomte, T., Le Montagner, Y., et al. (2012). Icy: An open bioimage informatics platform for extended reproducible research. *Nat. Methods* 9, 690–696.
- Chen, B.C., Legant, W.R., Wang, K., Shao, L., Milkie, D.E., Davidson, M.W., Janetopoulos, C., Wu, X.S., Hammer, J.A., Liu, Z., et al. (2014). Lattice light-sheet microscopy: Imaging molecules to embryos at high spatiotemporal resolution. *Science* 346, 1257998.
- Chenouard, N., Bloch, I., and Olivo-Marin, J.C. (2013). Multiple hypothesis tracking for cluttered biological image sequences. *IEEE Trans. Pattern Anal. Mach. Intell.* 35, 2736–2750.
- Couturier, L., Mazouni, K., Bernard, F., Besson, C., Reynaud, E., and Schweisguth, F. (2017). Regulation of cortical stability by RhoGEF3 in mitotic Sensory Organ Precursor cells in *Drosophila*. *Biol. Open* 6, 1851-1860.
- Daniel, K., Icha, J., Horenburg, C.D., Norden, C., Mansfeld, J.(2018). Conditional control of fluorescent protein degradation by an auxin-dependent nanobody. *Nat Commun.* 9:3297.

Demmerle, J., Innocent, C., North, A.J., Ball, G., Müller, M., Miron, E., Matsuda, A., Dobbie, I.M., Markaki, Y., and Schermelleh, H. (2017). Statagic and practical guidelines for successful structure illumination microscopy. *Nat. Protoc.* *12*, 988-1010.

Dertinger, T., Colyer, R., Iyer, G., Weiss, S. & Enderlein, J. (2009). Fast, background-free, 3D super-resolution optical fluctuation imaging (SOFI). *Proc. Natl. Acad. Sci. U.S.A.* *106*, 22287-22292.

Ebrahim, S., Fujita, T., Millis, B.A., Kozin, E., Ma, X., Kawamoto, S., Baird, M.A., Davidson, M., Yonemura, S., Hisa, Y., et al. (2013). NMII forms a contractile transcellular sarcomeric network to regulate apical cell junctions and tissue geometry. *Cur. Biol.* *23*, 731-736.

Eckart, C., and Young, G. (1936). The approximation of one matrix by another of lower rank. *Psychometrika* *1*, 211–218.

Fenix, A.M., Taneja, N., Buttler, C.A., Lewis, J., Van Engelenburg, S.B., Ohi, R., and Burnette, D.T. (2016). Expansion and concatenation of non-muscle myosin IIA filaments drive cellular contractile system formation during interphase and mitosis. *Mol. Biol. Cell.* *27*, 1465-1478.

Fleurie, A., Lesterlin, C., Manuse, S., Zhao, C., Cluzel, C., Lavergne, J.P., Franz-Wachtel, M., MacEk, B., Combet, C., Kuru, E., et al. (2014). MapZ marks the division sites and positions FtsZ rings in *Streptococcus pneumoniae*. *Nature* *516*, 260–262.

Gateau, J., Rigneault, H., and Guillon, M. (2017). Complementary Speckle Patterns: Deterministic Interchange of Intrinsic Vortices and Maxima through Scattering Media. *Phys. Rev. Lett.* *118*, 043903.

Gho, M., Bellaiche, Y., and Schweisguth, F. (1999). Revisiting the *Drosophila* microchaete lineage : a novel intrinsically asymmetric cell division generates a glial cell. *Development* *126*, 3573-3584.

Goodman, J. W. (2007). *Speckle Phenomena in Optics : Theory and Applications* (Roberts, Greenwood Village, Colorado).

Guo, Y., Li, D., Zhang, S., Yang, Y., Liu, J.J., Wang, X., Liu, C., Milkie, D.E., Moore, R.P., Tulu, U.S., et al. (2018). Visualizing Intracellular Organelle and Cytoskeletal Interactions at Nanoscale Resolution on Millisecond Timescales. *Cell* *175*, 1430-1442.e17.

Gustafsson, M.G.L. (2000). Surpassing the lateral resolution limit by a factor of two using structured illumination microscopy. *J. Microscopy* *198*, 82-87.

Gustafsson, M.G.L., Shao, L., Carlton, P.M., Wang, C.J.R., Golubovskaya, I., Cande, W.Z., Agard, D.A., and Sedat, J.W. (2008). Three dimensional resolution doubling in wide-field fluorescence microscopy by structures illumination. *Biophys. J.* *94*, 4957-4970.

Gustafsson, N., Culley, S., Ashdown, G., Owen, D.M., Pereira, P.M., and Henriques, R. (2016). Fast live-cell conventional fluorophore nanoscopy with ImageJ through super-resolution radial fluctuations. *Nat. Commun.* *7*:12471.

He, L., Wang, X., Tang, H.L., and Montell, D.J. (2010). Tissue elongation requires oscillating contractions of a basal actomyosin network. *Nat. Cell Biol.* *12*, 1133–1142.

Heintzmann, R., and Cremer, C. (1999). Laterally modulated excitation microscopy: improvement of resolution by using a diffraction grating. *Proc SPIE.* *3568*, 185–96.

Hell, S.W., and Wichmann, J. (1994). Breaking the diffraction limit by stimulated emission : stimulated-emission-depletion fluorescence microscopy. *Opt. Lett.* *19*, 780-782.

Hess, S.T., Girirajan, T.P.K., and Mason, M.D. (2006) Ultra-high resolution imaging by fluorescence photoactivation localization microscopy. *Biophys. J.* *91*, 4258-4272.



Hu, S., Dasbiswas, K., Guo, Z., Tee, Y.H., Thiagarajan, V., Hersen, P., Chew, T.L., Safran, S.A., Zaidel-Bar, R., and Bershadsky, A.D., (2017). Long-range self-organization of cytoskeletal myosin II filament stacks. *Nat. Cell Biol.* 19, 133-141.

Klar, T.A., and Hell, S.W. (1999). Subdiffraction resolution in far-field fluorescence microscopy. *Opt. Lett.* 24, 954-956.

Idier, J., Labouesse, S., Allain, M., Liu, P., Bourguignon, S., and Sentenac, A. (2018). On the Superresolution Capacity of Imagers Using Unknown Speckle Illuminations. *IEEE Trans. Comput. Imaging* 4, 87–98.

Labouesse, S., Negash, A., Idier, J., Bourguignon, S., Mangeat, T., Liu, P., Sentenac, A., and Allain, M. (2017). Joint Reconstruction Strategy for Structured Illumination Microscopy with Unknown Illuminations. *IEEE Trans. Image Process.* 26, 2480–2493.

Liu, T.L., Upadhyayula, S., Milkie, D.E., Singh, V., Wang, K., Swinburne, I.A., Mosaliganti, K.R., Collins, Z.M., Hiscock, T.W., Shea, J., et al. (2018). Observing the cell in its native state: Imaging subcellular dynamics in multicellular organisms. *Science* 360, eaaq1392.

Marsh, R.J., Pfisterer, K., Bennett, P., Hirvonen, L.M., Gautel, M., Jones, G.E., and Cox, S. (2018). Artifact-free high-density localization microscopy analysis. *Nat. Methods* 15, 689-692.

Martin, A.C., Kaschube, M., and Wieschaus, E.F. (2009). Pulsed contractions of an actin-myosin network drive apical constriction. *Nature* 457, 495-499.

Mary, H., Fouchard, J., Gay, G., Reyes, C., Gauthier, T., Gruget, C., Pécréaux, J., Tournier, S., and Gachet, Y. (2015). Fission yeast kinesin-8 controls chromosome congression independently of oscillations. *J. Cell Sci.* 128, 3720–3730.

Meddens, M.B., Pandzic, E., Slotman, J.A., Guillet, D., Joosten, B., Mennens, S., Paardekooper, L.M., Houtsmuller, A.B., van den Dries, K., Wiseman, P.W., et al. (2016). Actomyosin-dependent dynamic spatial patterns of cytoskeletal components drive mesoscale podosome organization. *Nat. Commun.* 7:13127.

Mercer, J. (1909), "Functions of positive and negative type and their connection with the theory of integral equations", *Philosophical Transactions of the Royal Society A*, 209, 415–446.

Moreno, S., Klar, A., and Nurse, P. (1991). Molecular genetic analysis of fission yeast *Schizosaccharomyces pombe*. *Methods Enzymol.* 194, 795-823.

Mudry, E., Belkebir, K., Girard, J., Savatier, J., Le Moal, E., Nicoletti, C., Allain, M., and Sentenac, A. (2012). Structured illumination microscopy using unknown speckle patterns. *Nat. Photonics* 6, 312–315.

Negash, A., Labouesse, S., Chaumet P., Belkebir K., Giovannini H., Idier, J. and Sentenac A. (2018) Two-photon speckle illumination for super-resolution microscopy. *J. Opt. Soc. Am. A*, 35, 1028-1033.

Nieuwenhuizen, R.P.J., Lidke, K.A., Bates, M., Puig, D.L., Grünwald, D., Stallinga, S., and Rieger, B. (2013). Measuring image resolution in optical nanoscopy. *Nat. Methods* 10, 557–562.

O’Shaughnessy, E.C., Stone, O.J., LaFosse, P.K., Azoitei, M.L., Tsygankov, D., Heddleston, J.M., Legant, W.R., Wittchen, E.S., Burrige, K., Elston, T.C., et al. (2019). Software for lattice light-sheet imaging of FRET biosensors, illustrated with a new Rap1 biosensor. *J. Cell Biol.* 218, 3153–3160.

Ovesný, M., Křížek, P., Borkovec, J., Švindrych, Z., and Hagen, G.M. (2014). ThunderSTORM: A comprehensive ImageJ plug-in for PALM and STORM data analysis and super-resolution imaging. *Bioinformatics* 30, 2389–2390.

Prasad, M., Jang, A.C.C., Starz-Gaiano, M., Melani, M., and Montell, D.J. (2007). A protocol for culturing

*drosophila melanogaster* stage 9 egg chambers for live imaging. *Nat. Protoc.* 2, 2467–2473.

Rauzi, M., Lenne, P.F., and Lecuit, T. (2010). Planar polarized actomyosin contractile flows control epithelial junction remodeling. *Nature* 468, 1110-1114.

Richter, K. N., Revelo, N. H., Seitz, K.J., Helm, M. S., Sarkar, D., Saleeb, R. S., D'Este, E., Eberle, J., Wagner, E., Vogl, C., et al. (2018). Glyoxal as an alternative fixative to formaldehyde in immunostaining and super-resolution microscopy. *EMBO J.* 37, 139-159.

Rust, M.J., Bates, M., and Zhuang, X. (2006). Sub-diffraction-limit imaging by stochastic optical reconstruction microscopy (STORM). *Nat. Methods* 3, 793-795.

Shao, L., Kner, P., Rego, E.H., and Gustafsson, M.G.L. (2011). Super-resolution 3D microscopy of live whole cells using structured illumination. *Nat. Methods* 8, 1044–1048.

Shain, W.J., Vickers, N.A., Negash, A., Bifano, T., Sentenac, A., and Mertz, J. (2017). Dual fluorescence-absorption deconvolution applied to extended-depth-of-field microscopy. *Opt. Lett.* 42, 4183.

Sibarita, J. B., (2005). Deconvolution microscopy. *Adv. Biochem. Engin./Biotechnol.* 95, 201– 243

Sivaguru, M., Urban, M.A., Fried, G., Wessel, C.J., Mander, L., Punyasena, S.W. (2018) Comparative performance of airyscan and structured illumination superresolution microscopy in the study of the surface texture and 3D shape of pollen. *Microsc. Res. Tech.* 81, 101– 114.

Taylor, M. A., Nöbauer, T., Pernia-Andrade, A., Schlumm, F., and Vaziri, A. (2018). Brain-wide 3D light-field imaging of neuronal activity with speckle-enhanced resolution. *Optica* 5, 345-353.

Van den Dries, K., Nahidiazar, L., Slotman, J.A., Meddens, M.B.M., Pandzic, E., Joosten, B., Ansems, M., Schouwstra, J., Meijer, A., Steen, R., et al. (2019). Modular actin nano-architecture enables podosome protrusion and mechanosensing. *Nat. Commun.* 10, 583492.

Van Goethem, E., Poincloux, R., Gauffre, F., Maridonneau-Parini, I., and Le Cabec, V. (2010). Matrix architecture dictates three-dimensional migration modes of human macrophages : differential involvement of proteases and podosomes-like structures. *J. Immunol.* 184, 1049-1061.

Ventalon, C., and Mertz, J. (2005). Quasi-confocal fluorescence sectioning with dynamic speckle illumination. *Opt. Lett.*, 30, 3350-3352

Ventalon, C., Heintzmann, R., and Mertz, J. (2007). Dynamic speckle illumination microscopy with wavelet prefiltering. *Opt. Lett.* 32, 1417-1419

Wicker, K., Mandula, O., Best, G., Fiolka, R., and Heintzmann, R. (2013). Phase optimisation for structured illumination microscopy. *Opt. Express* 21, 2032.

Zessin, P.J.M., Sporbert, A., and Heilemann, M. (2016). PCNA appears in two populations of slow and fast diffusion with a constant ratio throughout S-phase in replicating mammalian cells. *Sci Rep* 6, 18779.

Zheng, W., Wu, Y., Winter, P., Fischer, R., Nogare, D.D., Hong, A., McCormick, C., Christensen, R., Dempsey, W.P., Arnold, D.B., et al. (2017). Adaptive optics improves multiphoton super-resolution imaging. *Nat. Methods* 14, 869–872.

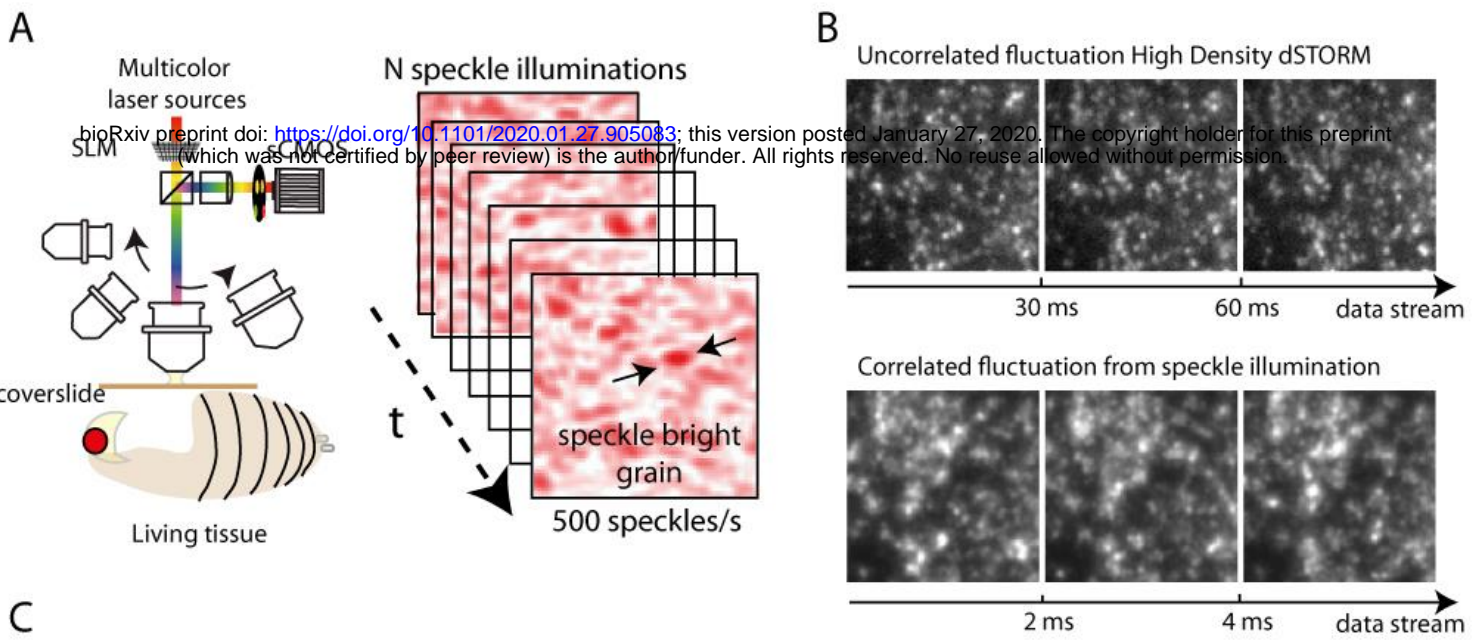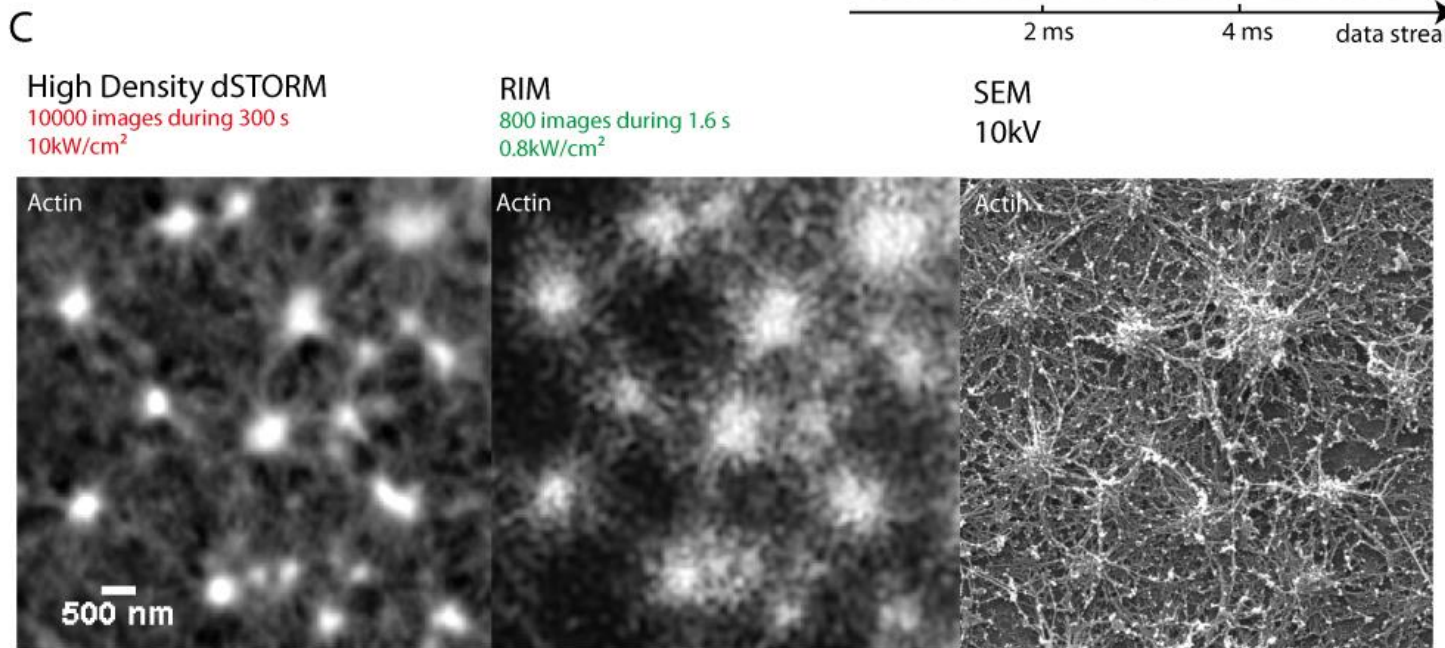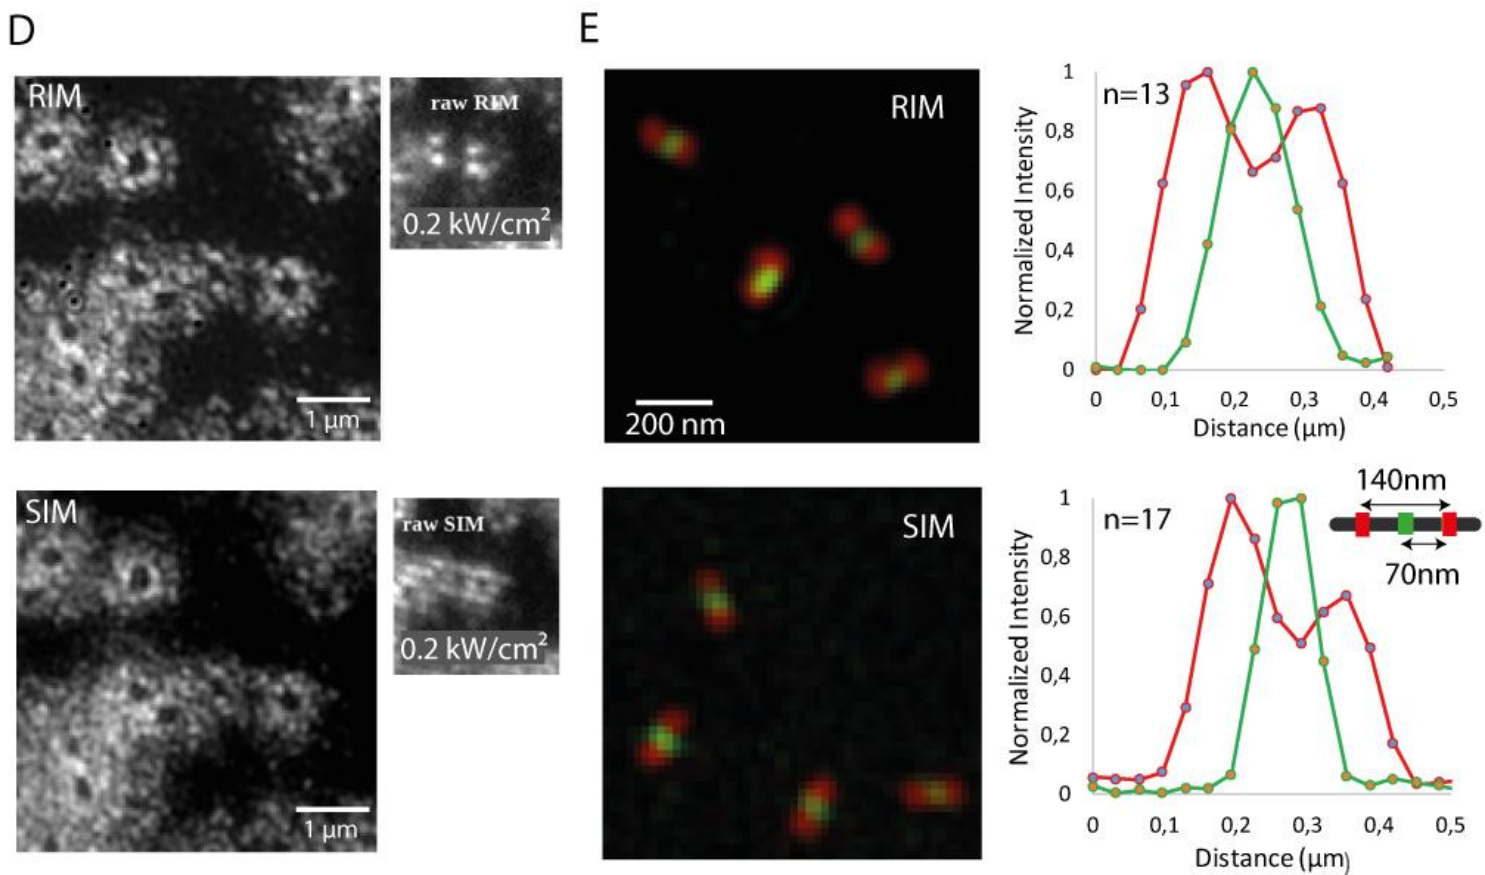

## Figure 1. RIM versus fluctuation microscopy and Structured Illumination Microscopy

- (A) RIM schematic implementation. A low cost Spatial Light Modulator (SLM) acting as a diffuser is implemented in a classical inverted microscope. Illuminated by multicolor lasers, the SLM sends five hundred different speckle patterns per second on the specimen. The fluorescence light is collected onto an sCMOS camera after appropriate filtering. The same set-up is operational for different objectives with numerical apertures between 0.15 and 1.49, and for wavelengths in the range of 450 nm to 600 nm.
- (B) Stream of raw data obtained with high-density fluctuation microscopy (dSTORM) or RIM (speckle illumination). One dSTORM image required 30 ms integration time while one RIM image required 2 ms. The sample is fixed macrophages, stained for F-actin, that have been unroofed to leave only the podosomes at the surface of the coverslip, shown in (C).
- (C) Super-resolved images of the macrophages F-actin network, obtained by processing 10,000 dSTORM raw images as in (B) using (Nanoj software SRRF; Gustafsson et al., 2016) or 800 raw RIM images using algoRIM, compared to a reference Scanning Electron Microscopy image. Note that RIM reconstruction is closer to the SEM image and does not suffer from the non-linear response to brightness of fluctuation microscopy.
- (D) Comparison between RIM and SIM imaging using the same experimental set-up. The RIM raw data are obtained by displaying 200 different random patterns on the SLM while the SIM data are obtained by displaying 30 different orientations and translations of a periodic pattern. Both experiments are performed with the same total number of photons injected into the sample ( $4 \mu\text{J}$  per pixel). The sample corresponds to unroofed fixed macrophages, as in Figure 1C, with tagged vinculin surrounding the podosomes cores attached to the substrate. Right, comparison between RIM and SIM raw images. Left, RIM and SIM reconstructions. The dynamics and the resolution of the reconstructions are similar.
- (E) Comparison between RIM and SIM resolution using the commercial ELYRA microscope for two-color imaging. The sample is a calibrated DNA nanoruler (SIM 140 YBY), where two red fluorophores (Alexa 561) attached at the DNA ends are separated by 140 nm, and are equidistant (70 nm) to a green fluorophore (Alexa 488). Both RIM and SIM estimated the red-to-green distance to about 70 nm as evidenced in the graphs displaying the green and red intensities with respect to the distance averaged over  $n=13$  and  $n=17$  nanorulers, respectively, using a co-location analysis. The total RIM imaging process took less than 10 min from the insertion of the sample in the microscope to the reconstruction. In contrast, the total SIM imaging process took about 2 h for completing the calibration, acquisition and checking steps (Ball et al, 2015 and Demmerle et al, 2017). In addition, while three parameters needed to be tuned for the RIM reconstruction scheme, seven were required for the SIM inversion method.

A

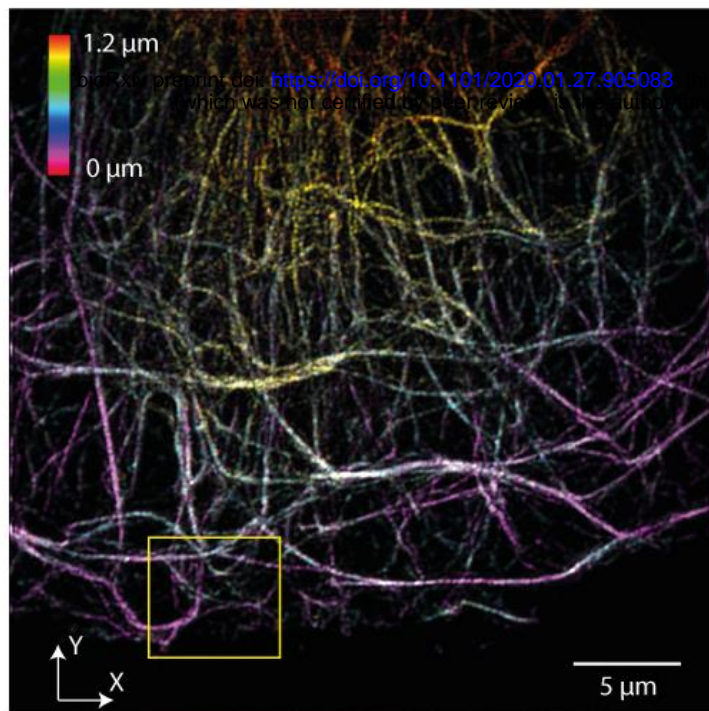

B

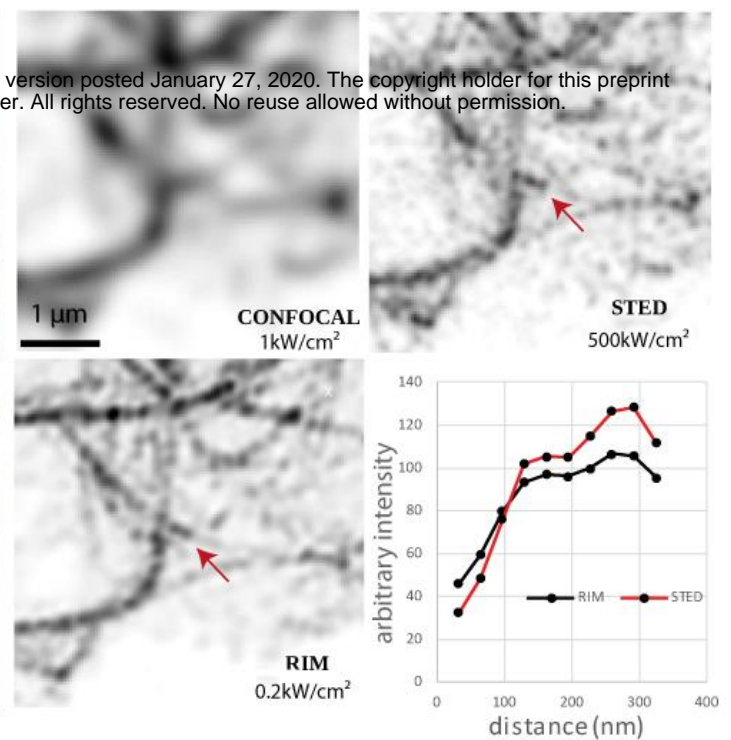

C

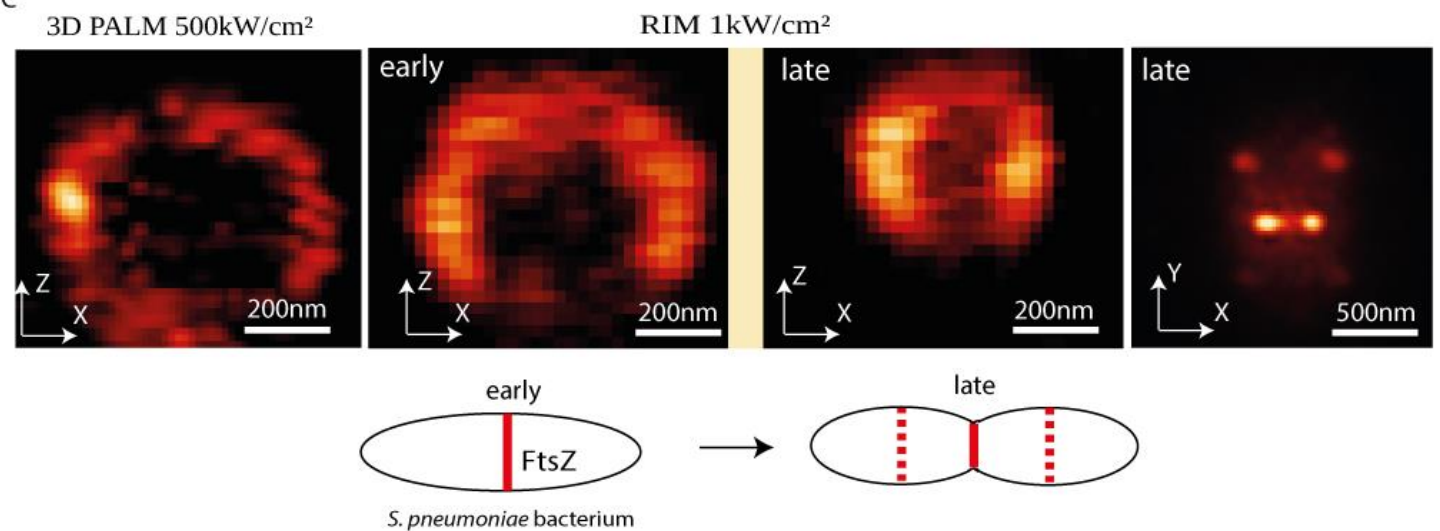

**Figure 2: RIM allows high-fidelity super-resolved live imaging in the three dimensions.**

(A) RIM 3D view of dense vimentin network from fixed HUVEC cell using a fluorescent antibody dedicated for STED microscopy with emission at 700 nm. The 3D image is made of 12 slices 100 nm apart. The color scale indicates the axial position (Fiji image processing). The yellow square locates the filaments enlarged in (B).

(B) The same vimentin filaments were observed by confocal microscopy (1 kW/cm<sup>2</sup>), STED microscopy (500 kW/cm<sup>2</sup>) or RIM at low photon budget (200 W/cm<sup>2</sup>). The curves depict the intensity recorded along the two dots shown by the arrow in RIM and STED images.

(C) Axial and transverse cuts of 3D RIM images of *S. pneumoniae* Z-rings containing FtsZ tagged with mEos3.2 taken at different stages of the cell division compared to 3D PALM equipped with adaptive optics. The 3D image is made of 20 slices, 64 nm apart. Early and late FtsZ annular constrictions from two dividing cells are shown (Z-ring diameters of 640 nm or 400 nm) in the axial cut. Right, transverse cut at the equatorial plane of the Z-rings of the two attached daughter cells (late division stage).

A

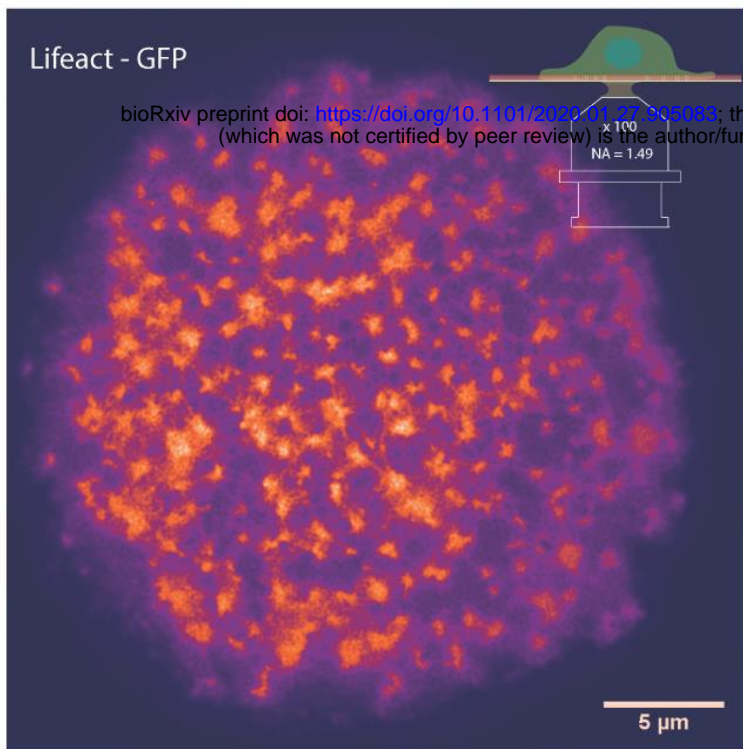

C

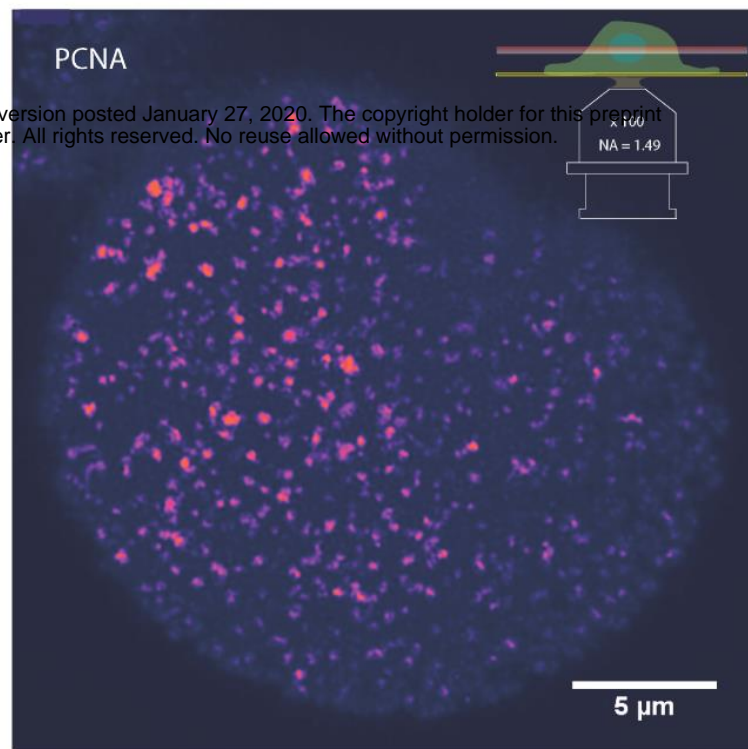

B

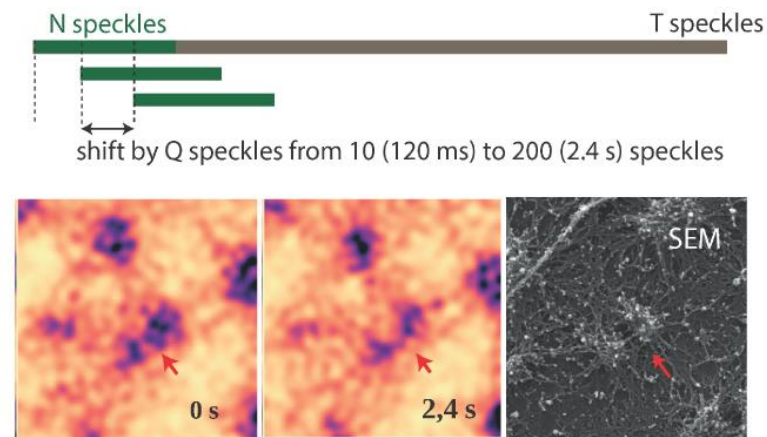

D

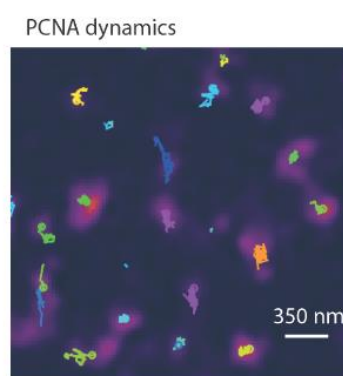

E

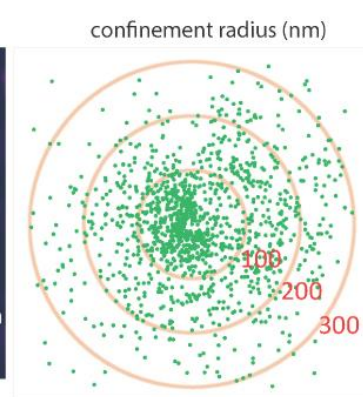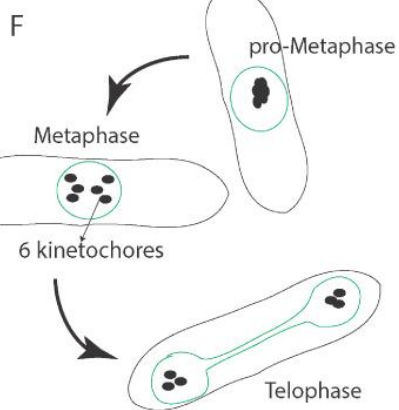

G

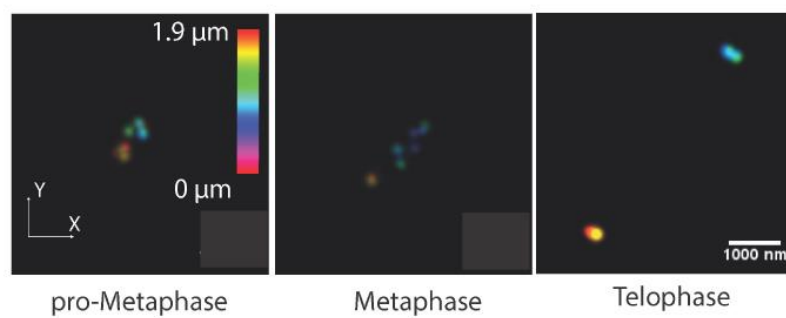

H

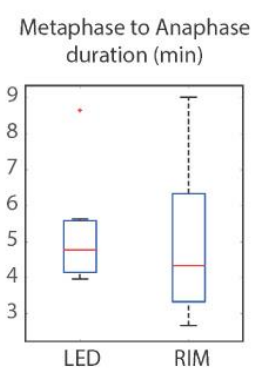

**Figure 3: RIM provides images with 120-nm resolution of dense and sparse samples with an adjustable temporal resolution and phototoxicity compatible with live imaging.**

- (A) 20 min dynamic imaging of human macrophage podosomes labeled with Lifeact-GFP, (frame from Movie S3). The temporal resolution was 0.12 s with an interleaved reconstruction strategy based on sliding windows of 800 speckles for image reconstruction.
- (B) Top: Principle of the interleaved reconstruction allowing an adjustable temporal resolution. A total of  $T$  (typically 100,000) speckle images are recorded every 12 ms for the whole movie. Stacks of  $N$  (typically 800) raw: images shifted every  $Q$  (typically 10) images are used for forming the super-resolved reconstruction. The  $N$  and  $Q$  numbers are adjusted depending on the nature of the sample (dense or sparse) and the time-scale of the biological events. Bottom: evolution of F-actin core podosome cores observed with RIM and compared to a Scanning Electron Microscopy image. The filament linking the two nodes is clearly visible on the two images (red arrows).
- (C) Frame from Movie S4 : PCNA dynamics during S phase in U2OS cell at 2  $\mu\text{m}$  depth from the cover slide with a temporal resolution of 12.5 ms.
- (D) Trajectories of individual spot of PCNA during 20 s. Two families of trajectories can be observed.
- (E) Confinement of PCNA clusters. The average confinement distances of the slow and fast replication clusters are equal to 120 nm and 300 nm, respectively.
- (F) Schematic representation of fission yeast kinetochore displacement during mitosis.
- (G) Kinetochores harboring GFP-tagged Ndc80 protein were resolved in pro-metaphase, metaphase, and telophase. The color coded bar indicates the axial position (*S. pombe* typically measures 3 to 4  $\mu\text{m}$  in diameter and 8 to 16  $\mu\text{m}$  in length).
- (H) Statistical comparison of metaphase to anaphase duration as observed by RIM or classical widefield microscopy with synchronized LED illumination on 7 mitosis. The red segments indicate the median value, the box edges are the 25 and 75 percentiles and the whiskers extend to the most extreme datapoints.

A

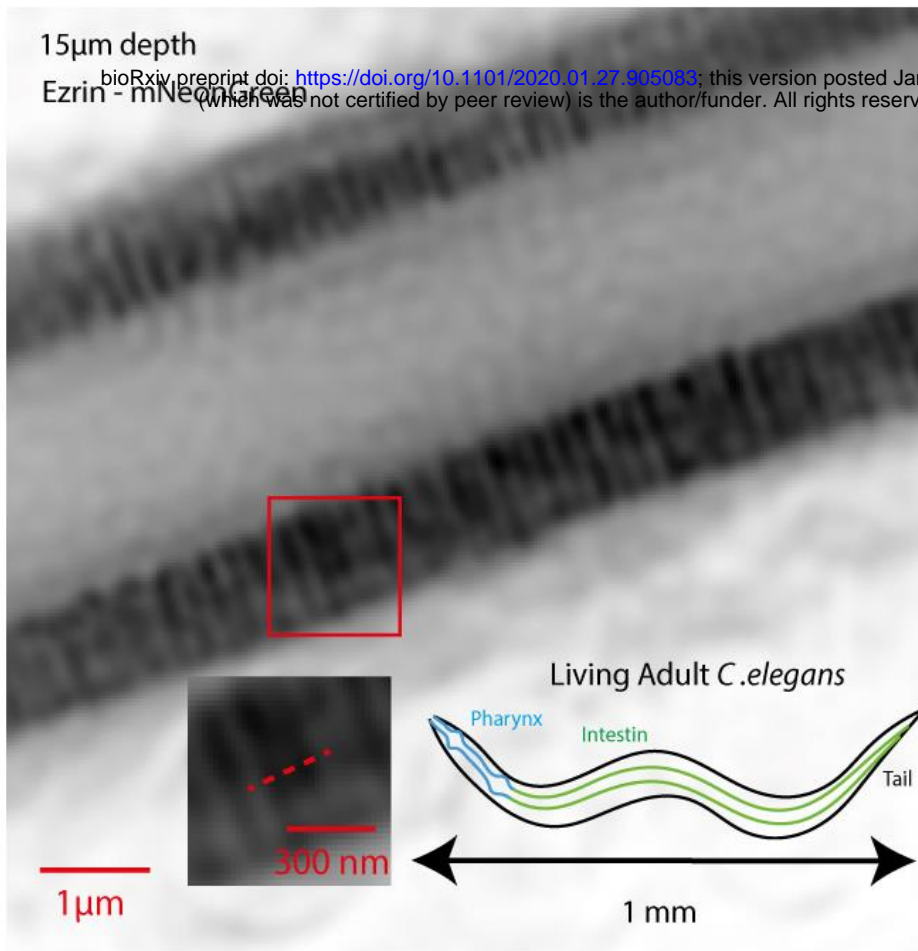

B

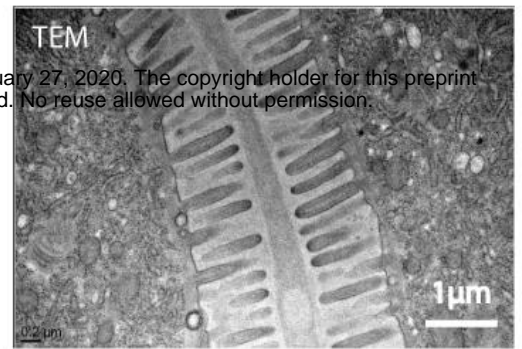

C

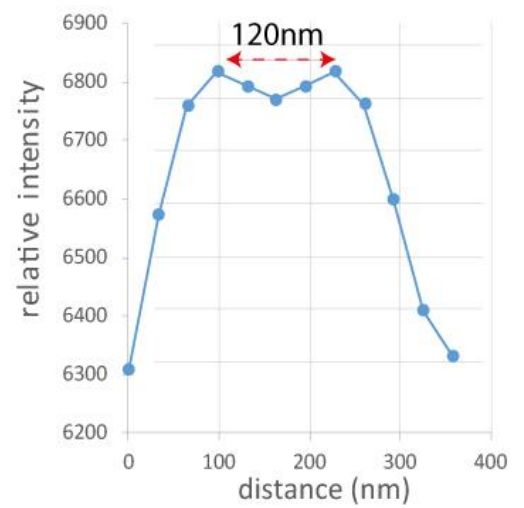

D

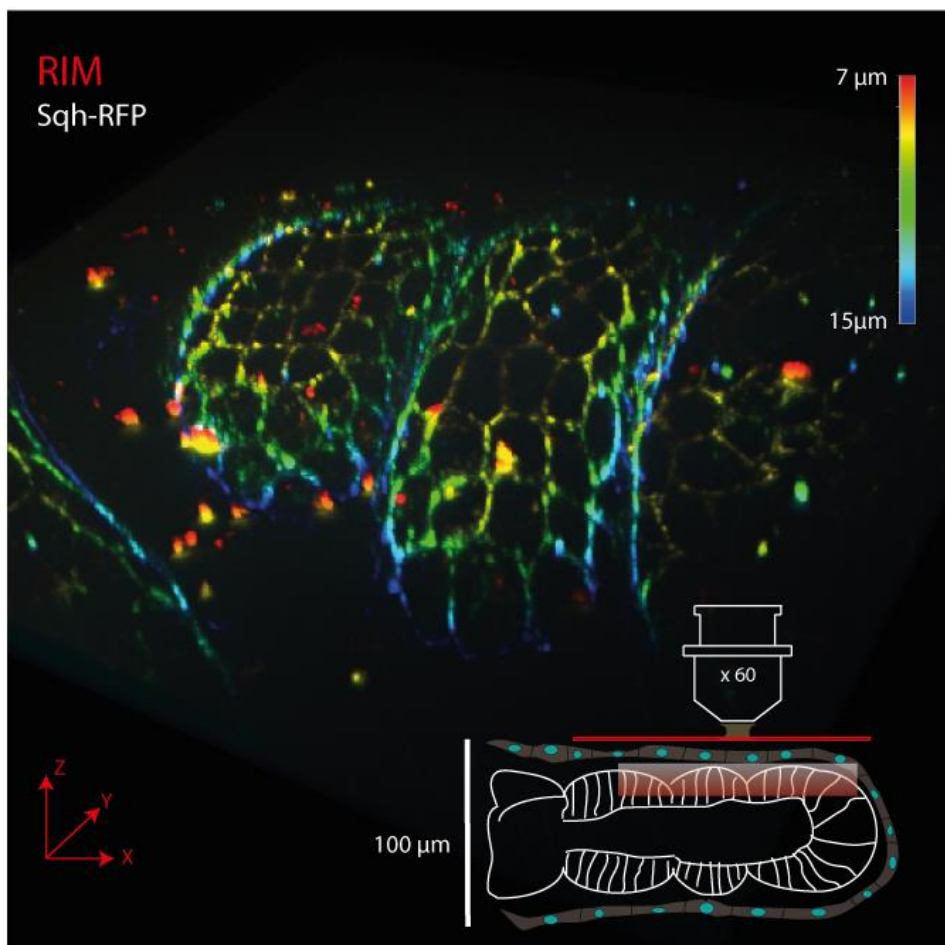

E

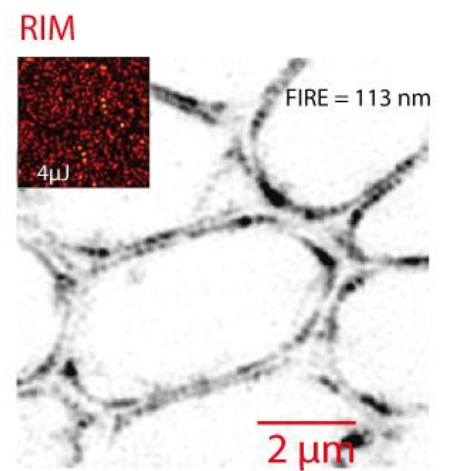

F

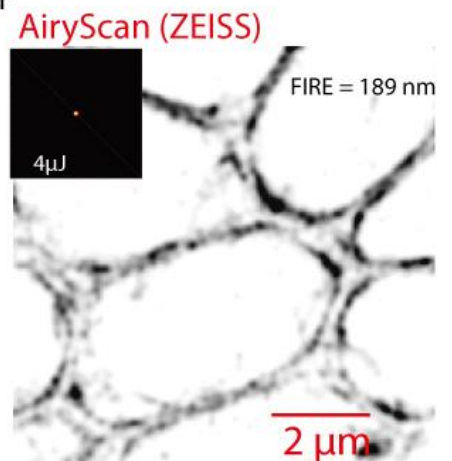



**Figure 4: RIM imaging of optically aberrant tissues without adaptive optics**

- (A) RIM imaging of ERM-1/ezrin endogenously tagged with mNeonGreen discloses the microvilli brush border of the intestine of a live L4 larva (*C. elegans*).
- (B) Transmission electron microscopy (TEM) image of microvilli from L4 Larva (*C. elegans*).
- (C) The intensity profile between two microvilli, indicated by the red bar in (A), shows that they are separated by about 120 nm as confirmed by the electron microscope image (B).
- (D) RIM 3D imaging (the color codes for the axial position) of a large field of view (110 $\mu$ m x 110 $\mu$ m) of the RFP-tagged regulatory light chain of the non-muscle Myosin II motor protein, spaghetti squash (Sqh) at the apical plane of the epithelium of a fixed developing *Drosophila melanogaster* leg (inset). The acquisition of each plane took 400 ms (2 ms per speckle, 200 speckles). In comparison, the AiryScan technology needed 4.3 s for imaging the same field of view.
- (E-F) RIM (E) and Airyscan (F) images of the same sample. RIM and AiryScan Fourier Image Resolution (FIRE) resolution was estimated using Fourier Ring Correlation (FRC) technique (113 nm and 189 nm, respectively). The insets depict the illumination patterns in RIM (speckle) and AiryScan (focused spot). The same number of photons corresponding to 4  $\mu$ J per diffraction limited pixel was injected in the sample for RIM and AiryScan (see Figure S4).

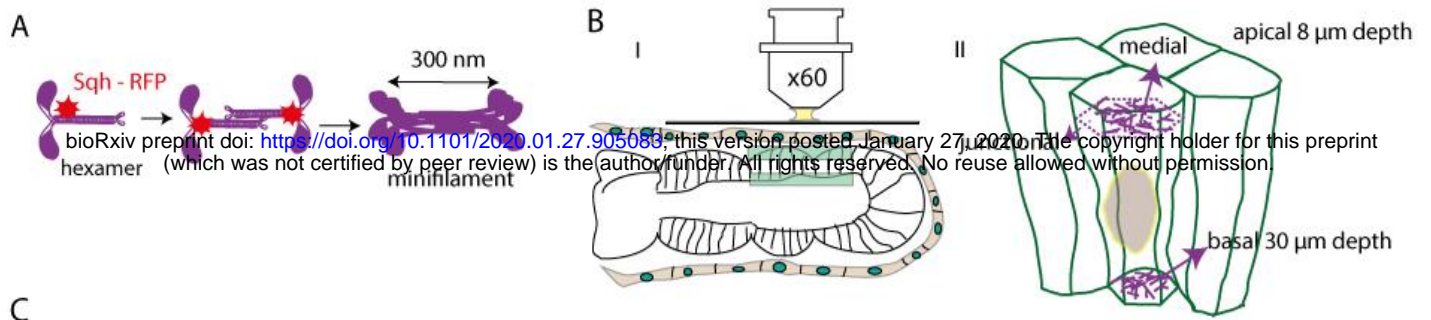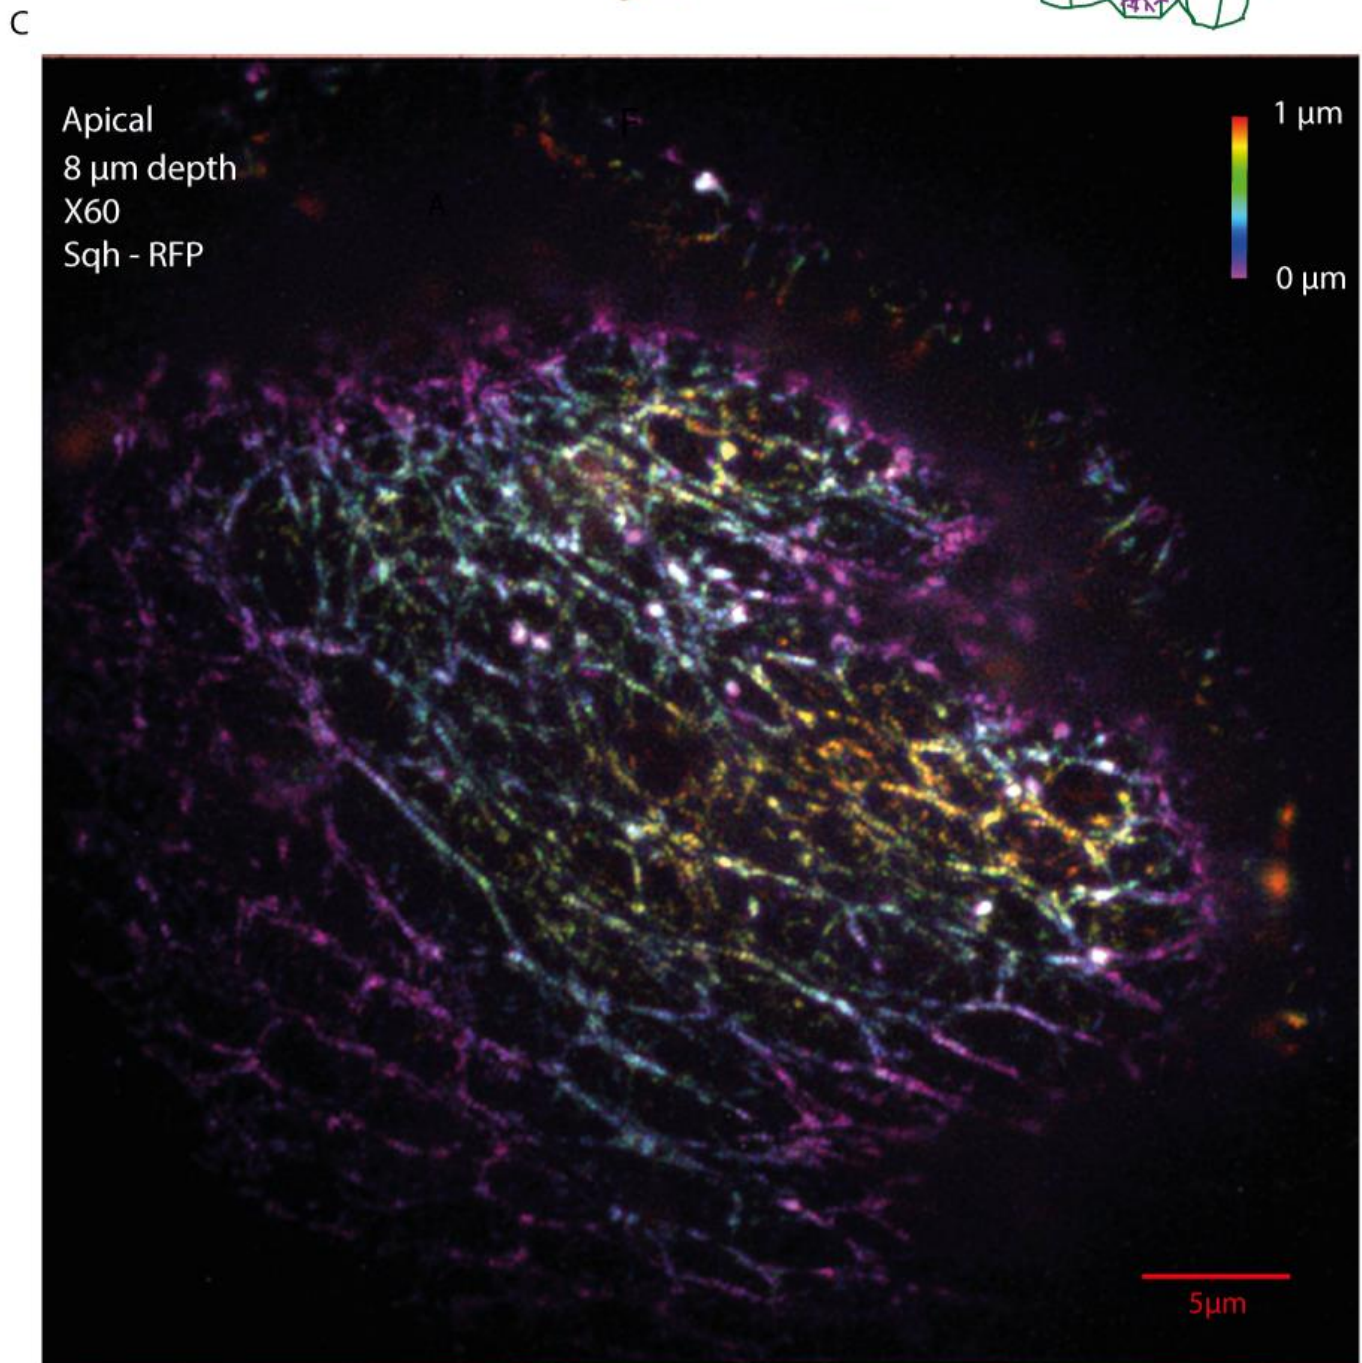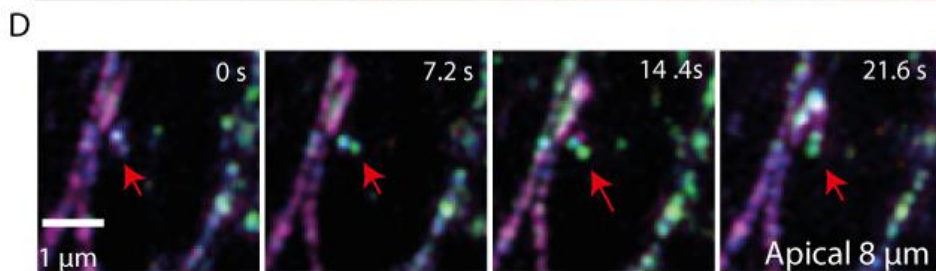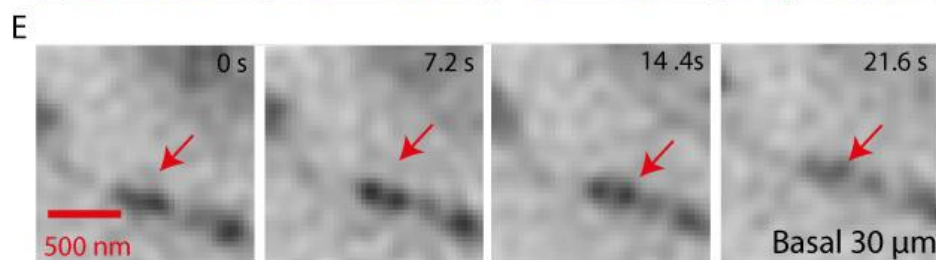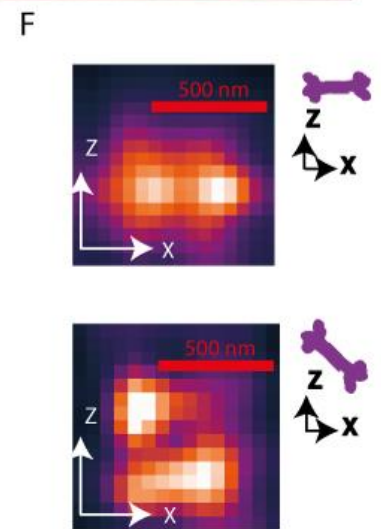

## Figure 5. 3D RIM imaging of Myosin II in live developing *Drosophila leg* epithelium

- (A) Schematical representation of the assembly of non-muscle Myosin II minifilaments. The hexameric Myosin II protein, composed of two heavy chains, two essential light chains and two regulatory lights chains (Sqh-RFP) interact in an antiparallel manner to form dimers. About 15 dimers of Myosin II filaments are organized in parallel bundles lying along actin filaments. Myosin II molecules assemble into 300 nm-long bipolar minifilaments with Myosin heads symmetrically located on each side.
- (B) (I) Experimental conditions during acquisition; (II) Cartoon depicting the distribution of medial, junctional and basal pools of Myosin II filaments in *Drosophila* polarized epithelial cells.
- (C) RIM 3D widefield view of the regulatory light chain of Myosin II (Sqh-RFP) networks at the apical plane (8  $\mu\text{m}$  depth) of *Drosophila* pupal leg.
- (D) Zoom illustrating the 3D motion of a single bipolar minifilament (red arrows) at the apical plane.
- (E) Zoom on the basal Myosin network taken at 30  $\mu\text{m}$  depth illustrating the ability of RIM to follow a single bipolar minifilament deep in optically aberrant tissue (red arrows).
- (F) Super zoom showing the ability of RIM to distinguish the fluorescent doublet of a Myosin II minifilament whatever its orientation in the (x,z) plane (bicubic interpolation of the 3D image made of seven slices 150 nm apart).

A

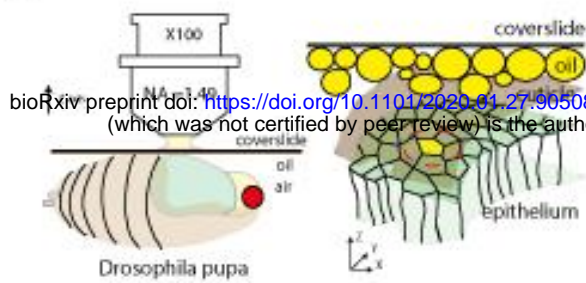

B

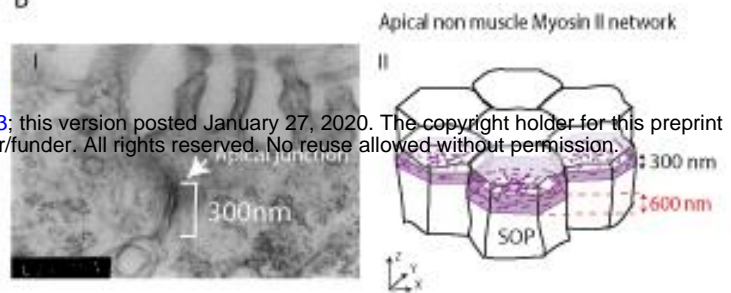

C

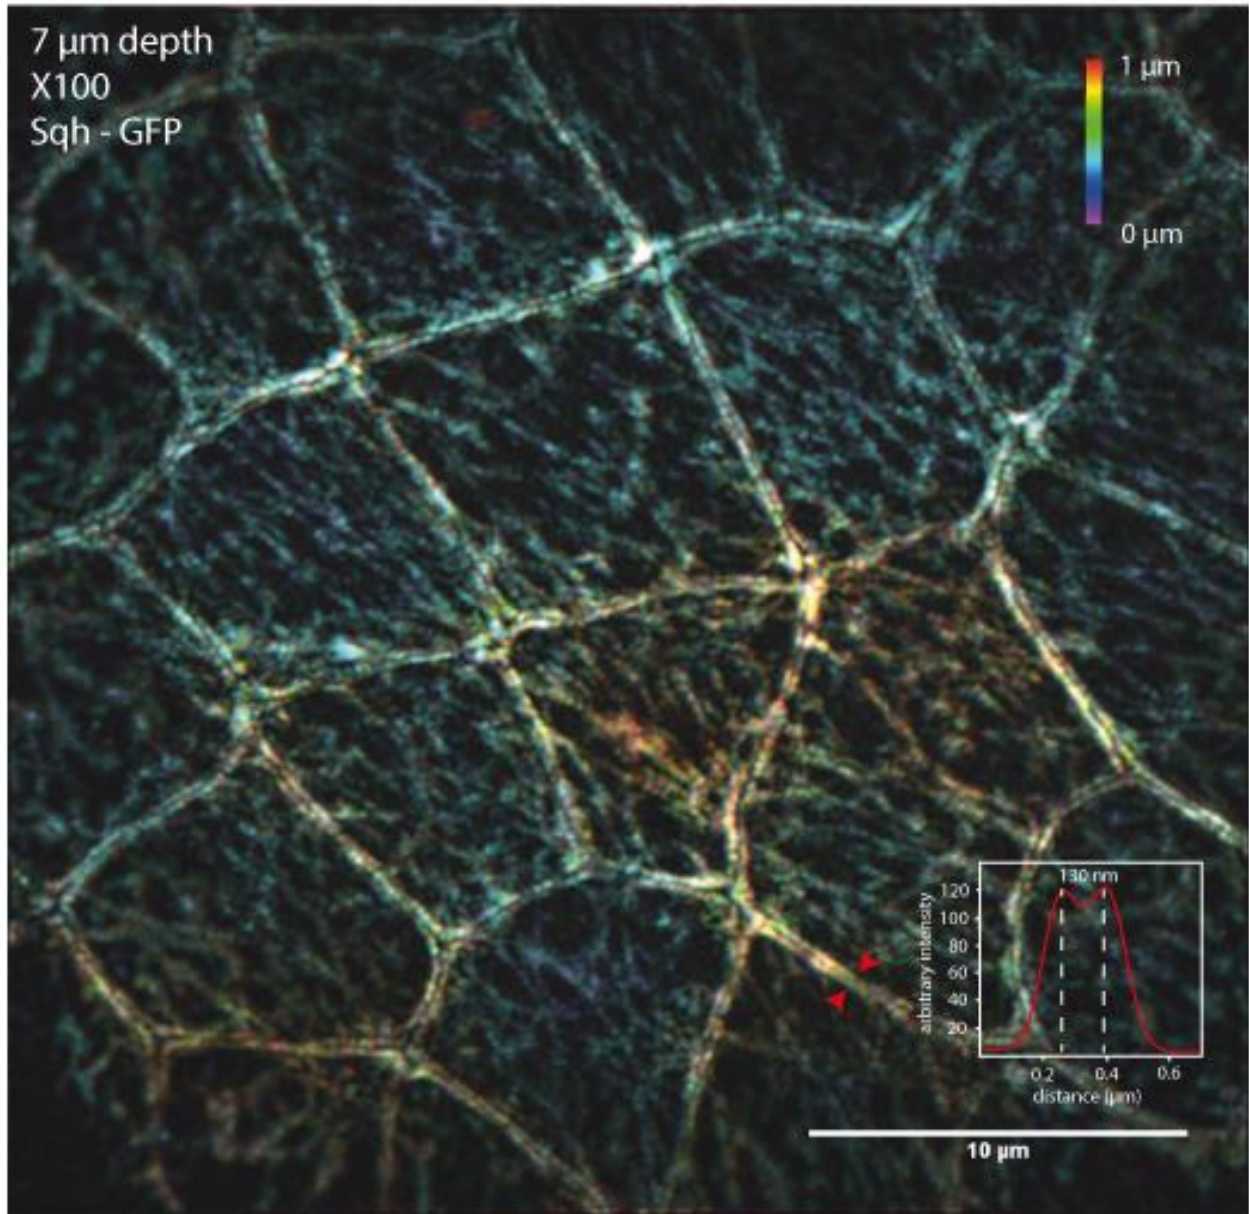

D

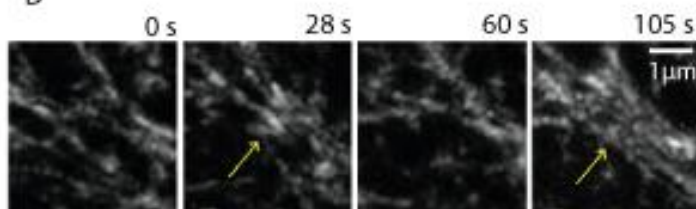

E

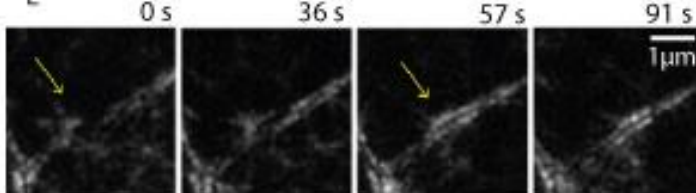

F

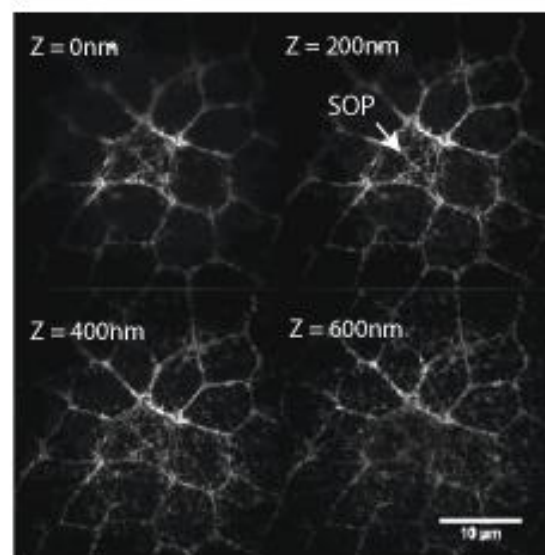

**Figure 6. 3D RIM Myosin II imaging in live *Drosophila* notum.**

- (A) Cartoon depicting the living pupa with pupal case (brown) removed on the notum (green) and experimental conditions during acquisition and cartoon depicting the location of medial and junctional Myosin II (magenta) of epidermal cells of the *Drosophila* pupal notum. The yellow cell corresponds to a Sensory Organ Precursor cell (SOP). The cells inside the dotted red circle are imaged in (C).
- (B) (I) TEM picture shows an orthogonal section of the junctional domain separating two epidermal cells of the pupal notum. The apical surface exhibits the typical organisation of microvilli. The electron dense zone at the cell-cell boundary corresponding to the adherent junction (arrow) has a thickness of 300 nm (white brackets). (II) Cartoon depicting the mosaic of the pupal notum cells composed of epidermal cells and of sensory organ precursors (SOP). The medial Myosin II network of SOP is positioned slightly basally relative to that of epidermal cells.
- (C) RIM 3D widefield view (made of four slices 200 nm apart) of the medial and junctional Myosin II network at the apical plane as described in (A) (Movie S8). The fluorescence intensity plot between the two red arrowheads at the level of junctional Myosin II networks of two adjacent cells revealed a 130 nm resolution which is maintained constant throughout the whole field of view.
- (D) Time-lapse imaging of Myosin II (see also Movie S8) showing the spatial reorganization (yellow arrow) and contractile behavior of medial Myosin II.
- (E) Fast reshaping of junctional Myosin with recruitment of Myosin II filaments (yellow arrow).
- (F) Four consecutive RIM slices at the level of the medial Myosin II network denoting the high axial resolution enabling to discriminate the thickness and positioning of the medial Myosin network in SOP about 300 nm basally relative to that of its neighboring epidermal cells.

A

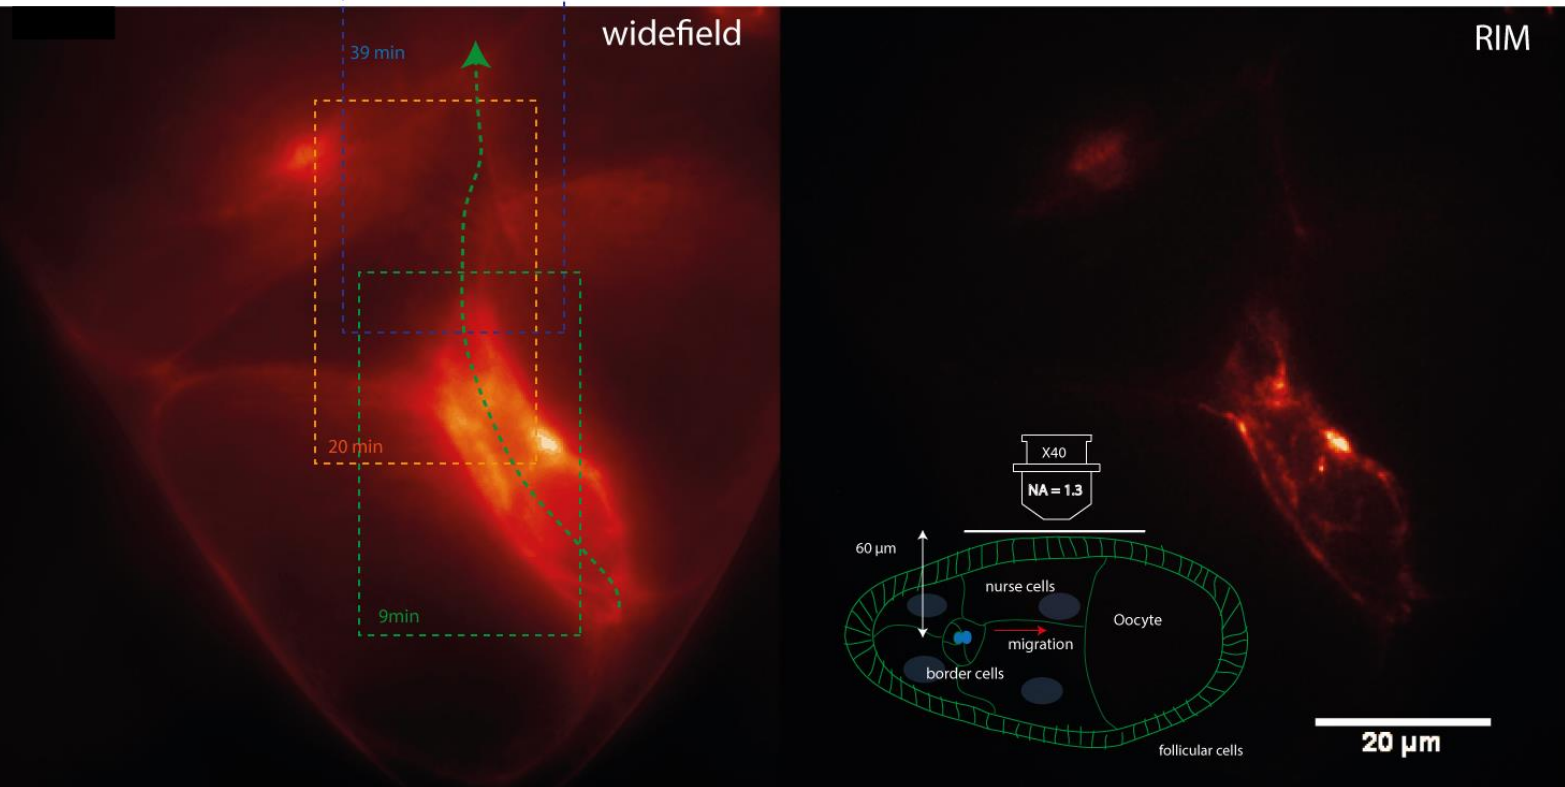

B

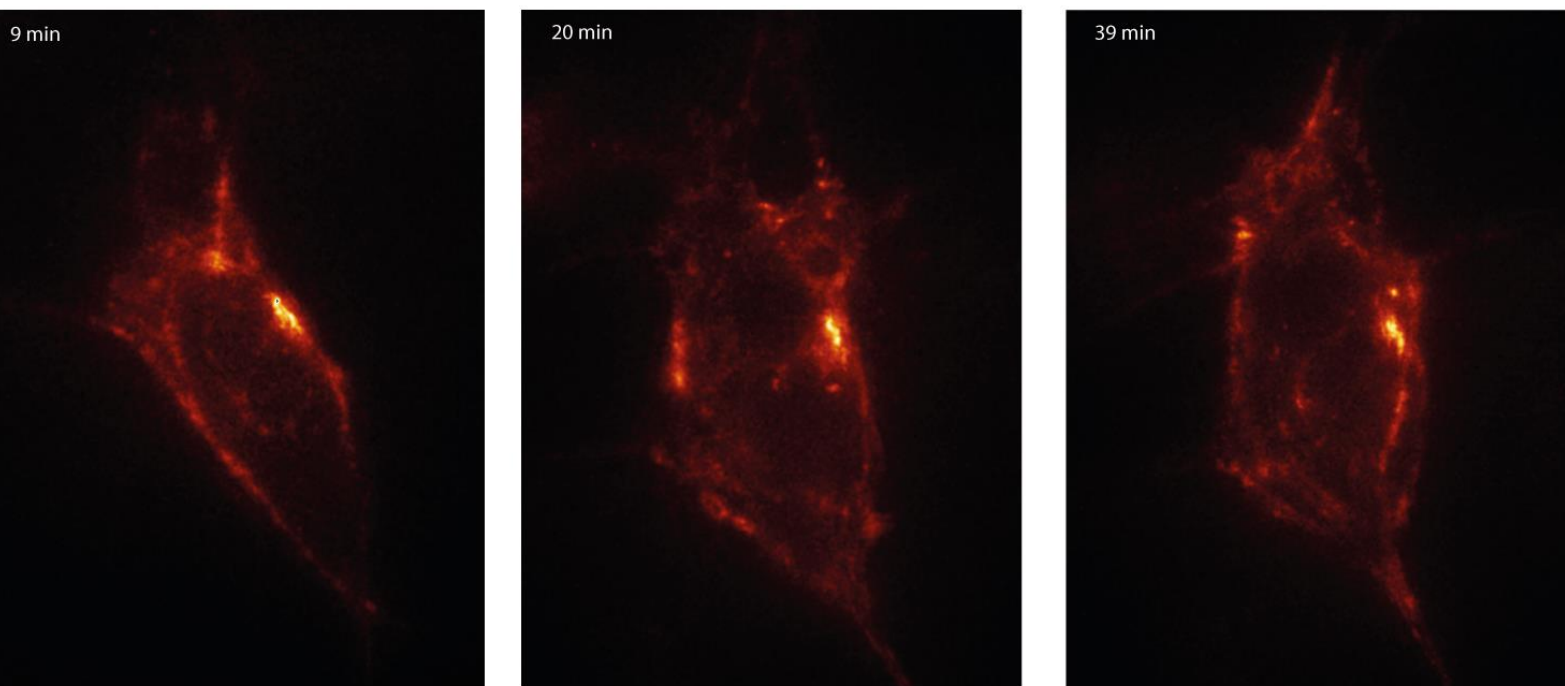

## Figure 7: Border cell migration in live *Drosophila* ovary

(A) 3D RIM imaging of F-actin labeled by UtrABD-GFP in *Drosophila* ovary during the detachment process of migrating border cells. The inset shows the experimental conditions during acquisition and the border cell migration trajectory. The 3D images are made of 10 different focal planes with axial step of 1  $\mu\text{m}$ . 200 speckles images are recorded per slice. Left (widefield): The deconvolved speckle images are summed to form a widefield image. The latter permits to locate the migrating cells in their environment as the out-of-focus fluorescence provides a transmission-microscope-like image. Right (RIM): a super-resolved reconstruction is obtained using algoRIM to gain details on the actin network. Sole the maximum intensity from the 10 slices is presented. The trajectory of the migration (the dotted green arrow and the red arrow in the ovary scheme) indicates the position of the collectively migrating cells at 9, 20 and 39 min.

(B) Images of the migrating cells taken 50  $\mu\text{m}$  deep inside the ovary at 9, 20 and 39 min following the trajectory shown in (A). The microfilaments of actin are well resolved during this collective cell migration.

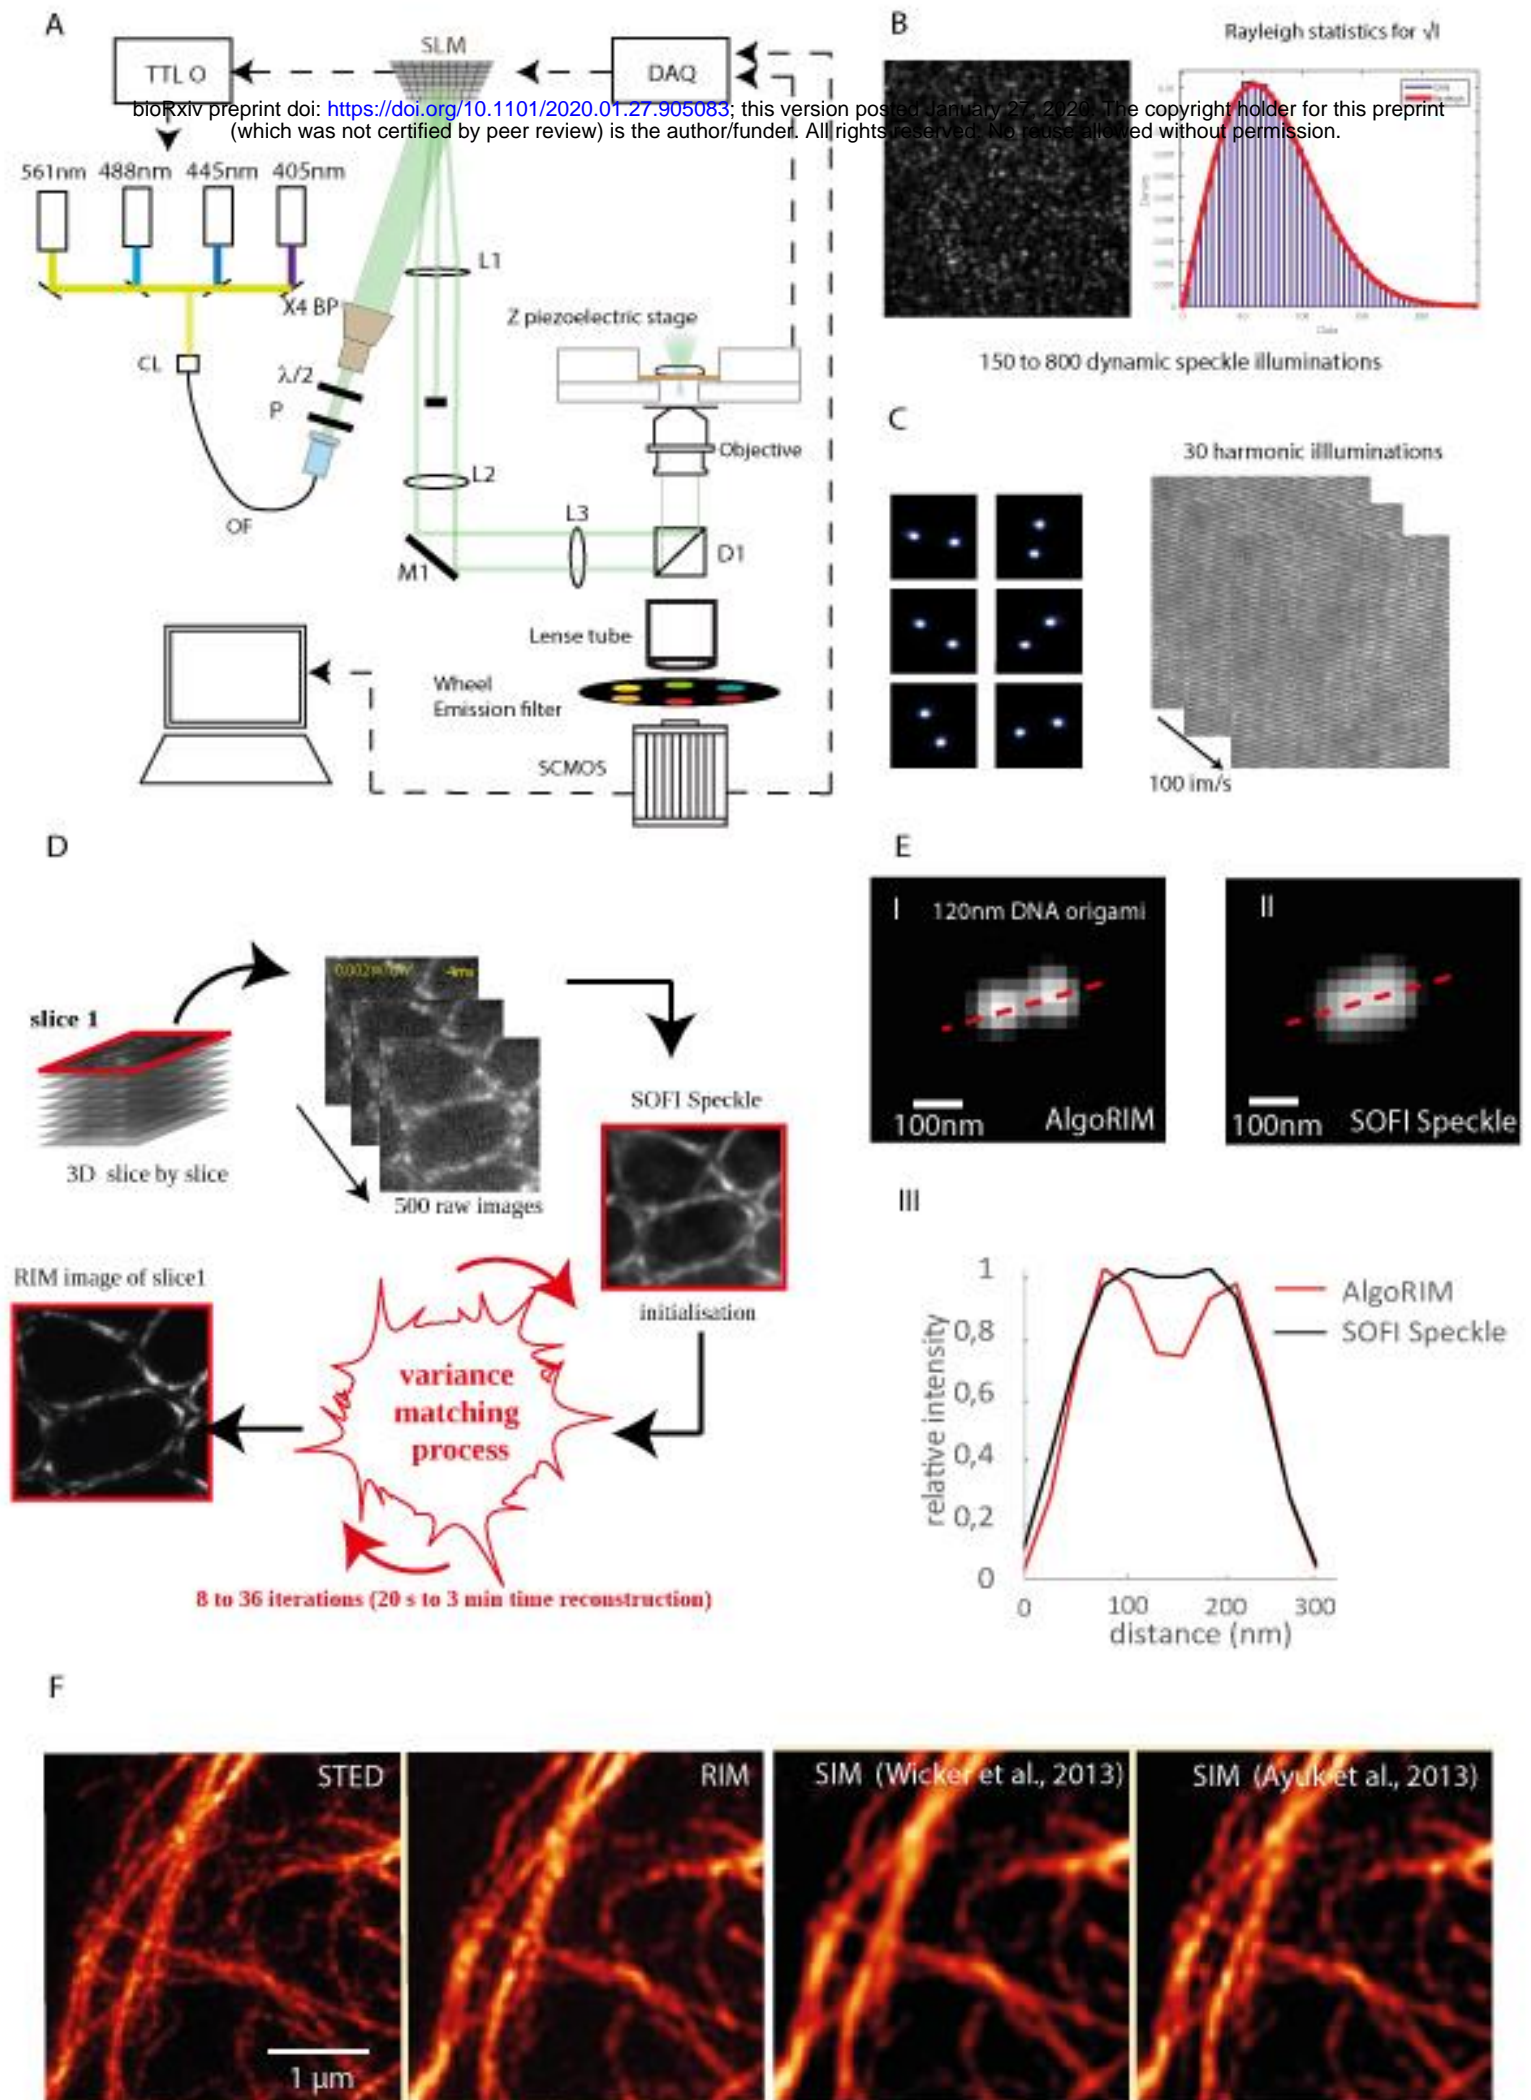



## Figure S1: RIM experimental and reconstruction principles related to Figure 1

- (A) Detailed RIM optical setup. Four fast diode lasers are used to illuminate the sample. The light is shaped into a 8 mm collimated TEM<sub>00</sub> beam thanks to an apochromatic fiber collimator (FC), an optical fiber (OF) and a beam expander (BP). After adjusting its polarization, it illuminates a fast Spatial Light phase binary Modulator (SLM), which is conjugated to the object plane of the microscope *via* the relay lenses L1-3. In the intermediate Fourier plane, a quarter wave plate, which is replaced by a pizza laminated polarizer in the SIM configuration, is introduced to produce a circular polarization state for the speckle. A quadrichroic beam splitter with a cut off centered at 405/488/561/633 nm (D1) reflects the laser beam towards the inverted microscope. The fluorescence is collected *via* the tube lens on a SCMOS camera after appropriate filtering using a wheel filter. A Z-piezoelectric stage permits to translate the sample through the focal plane.
- (B) Speckle intensity obtained with a binary phase SLM. The square root of the illumination fits the Rayleigh distribution statistics.
- (C) The same SLM can be used to provide the periodic illuminations used in SIM. Intensity obtained at the pupil or object plane of the microscope.
- (D) Principle of RIM. The fluorescence density of the sample is estimated by forming the variance of the deconvolved speckle images and estimating the sample so that the variance model best matches the experimental one (see RIM theory in the Supplemental Information). The key point of RIM is that the variance model does not assume that the speckle correlation is a Dirac function. The estimation is performed using an iterative conjugate gradient scheme. This procedure ensures a linear link between the reconstruction and the sample fluorescence density and improves significantly the resolution compared to the SOFI-speckle approach, which consists in taking the standard variation of the deconvolved speckle images (Taylor et al, 2018; Ventalon et al, 2007).
- (E) Low-resolution images of DNA nanoruler (SIM 120 B) are obtained for 200 different speckles. (I) Super-resolved image of the sample using AlgoRIM; (II) super-resolved image using the square root of the variance; (III) intensity profile plot along the dashed line in (I) and (II).
- (F) From left to right, STED, RIM and SIM reconstructions of the same vimentin network from fixed HUVEC cell using a fluorescence antibody dedicated for STED microscopy with excitation at 561nm and emission at 700 nm (large Stokes shift). The RIM reconstruction is very close to the STED image. SIM reconstruction performed using the algorithm of Wicker et al., (2013), implemented in the Zeiss Elyra, in which the period and phases of the periodic pattern are recovered from an analysis of the low-resolution images, did not give satisfactory results. Better results were obtained by resorting to a more sophisticated algorithm named filtered blind-SIM (Ayuk et al., 2013), that did not assume the periodicity of the illumination but requires significantly more computational time than the classical approach. This example points out the robustness of RIM processing by comparison with SIM.

A

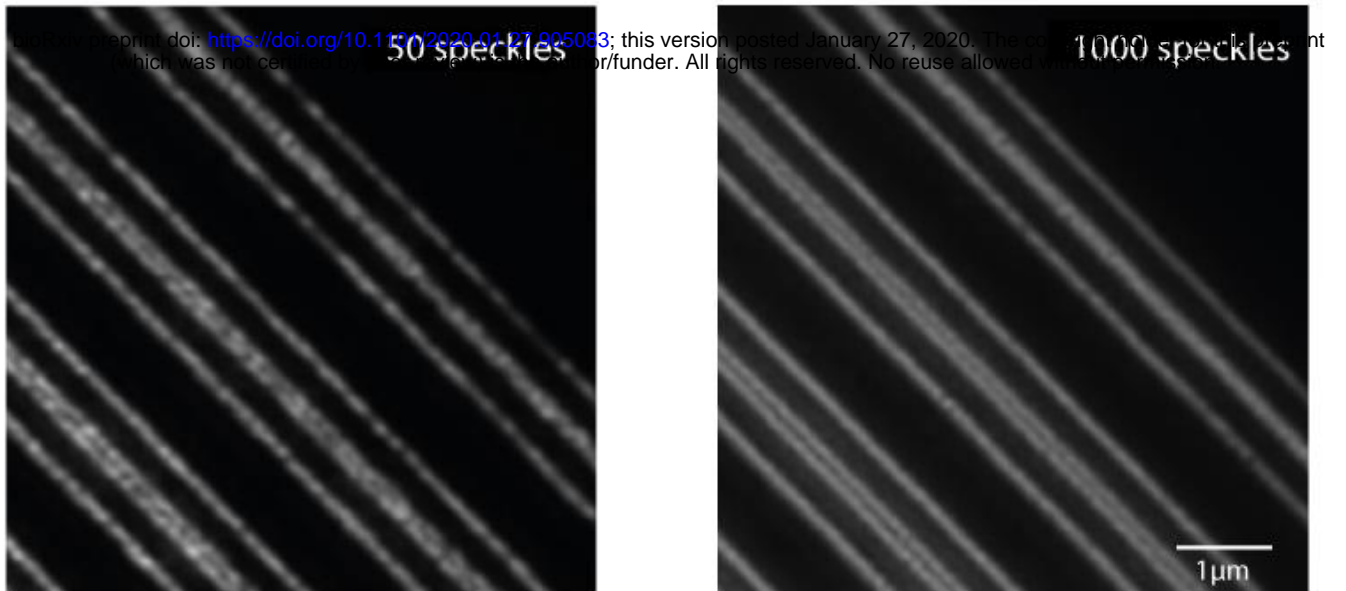

B

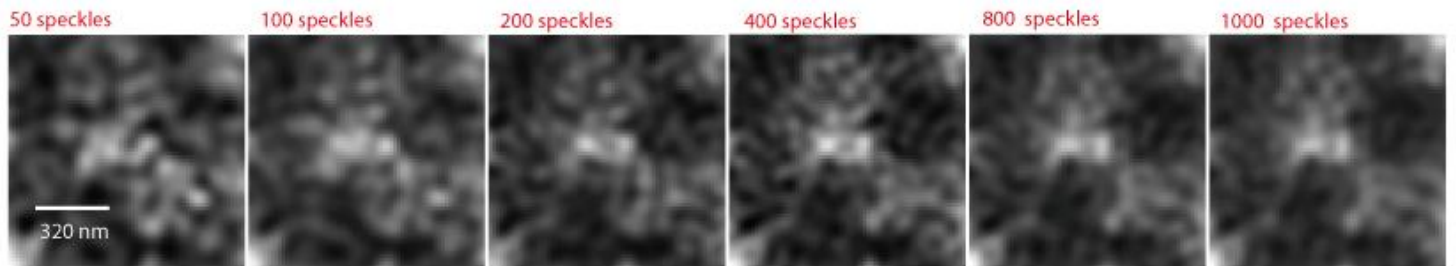

C

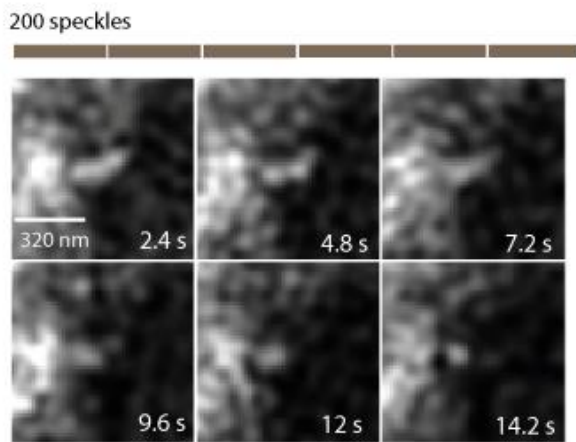

D

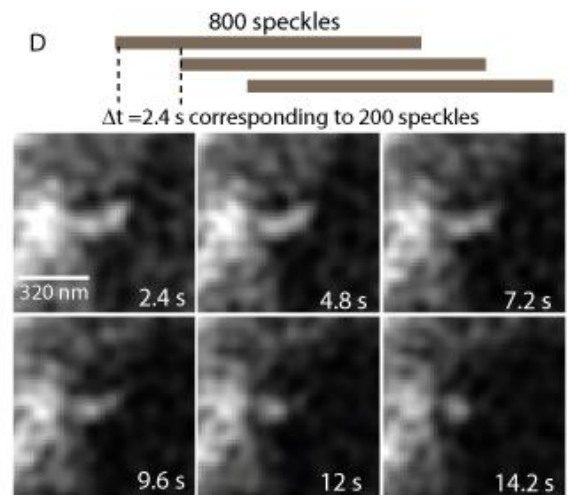

**Figure S3. Influence of the number of speckles in the RIM reconstruction, related to Figure 3.**

(A) RIM reconstruction from 50 or 1000 speckle images of a calibrated sample (ARGO-SIM Argoligh). Interdistance between the two center lines from bottom left to top right sold for being 120-90-60 nm but estimated to be 140, 120 and 90 nm, respectively, using the calibrated pixels of the image. RIM resolution is shown to distinguish the lines of the middle pattern. 1000 speckles yield a more homogeneous image of the sample.

(B) RIM reconstruction of a podosome core *versus* the number of speckle images used for the data processing. Extracted from Movie S3. Scale bar 800 nm. Due to the continuous spatial reorganization of podosomes, 400 speckles is a better choice than 1000 speckles.

(C) RIM images sequences of F-actin clusters with classical RIM reconstruction using 200 speckles (12 ms per speckle). Scale bar, 800 nm.

(D) RIM images sequences of F-actin podosomes core with interleaved reconstruction: 800 speckles shifted by 200 speckles are used for each time point. Scale bar, 800 nm.

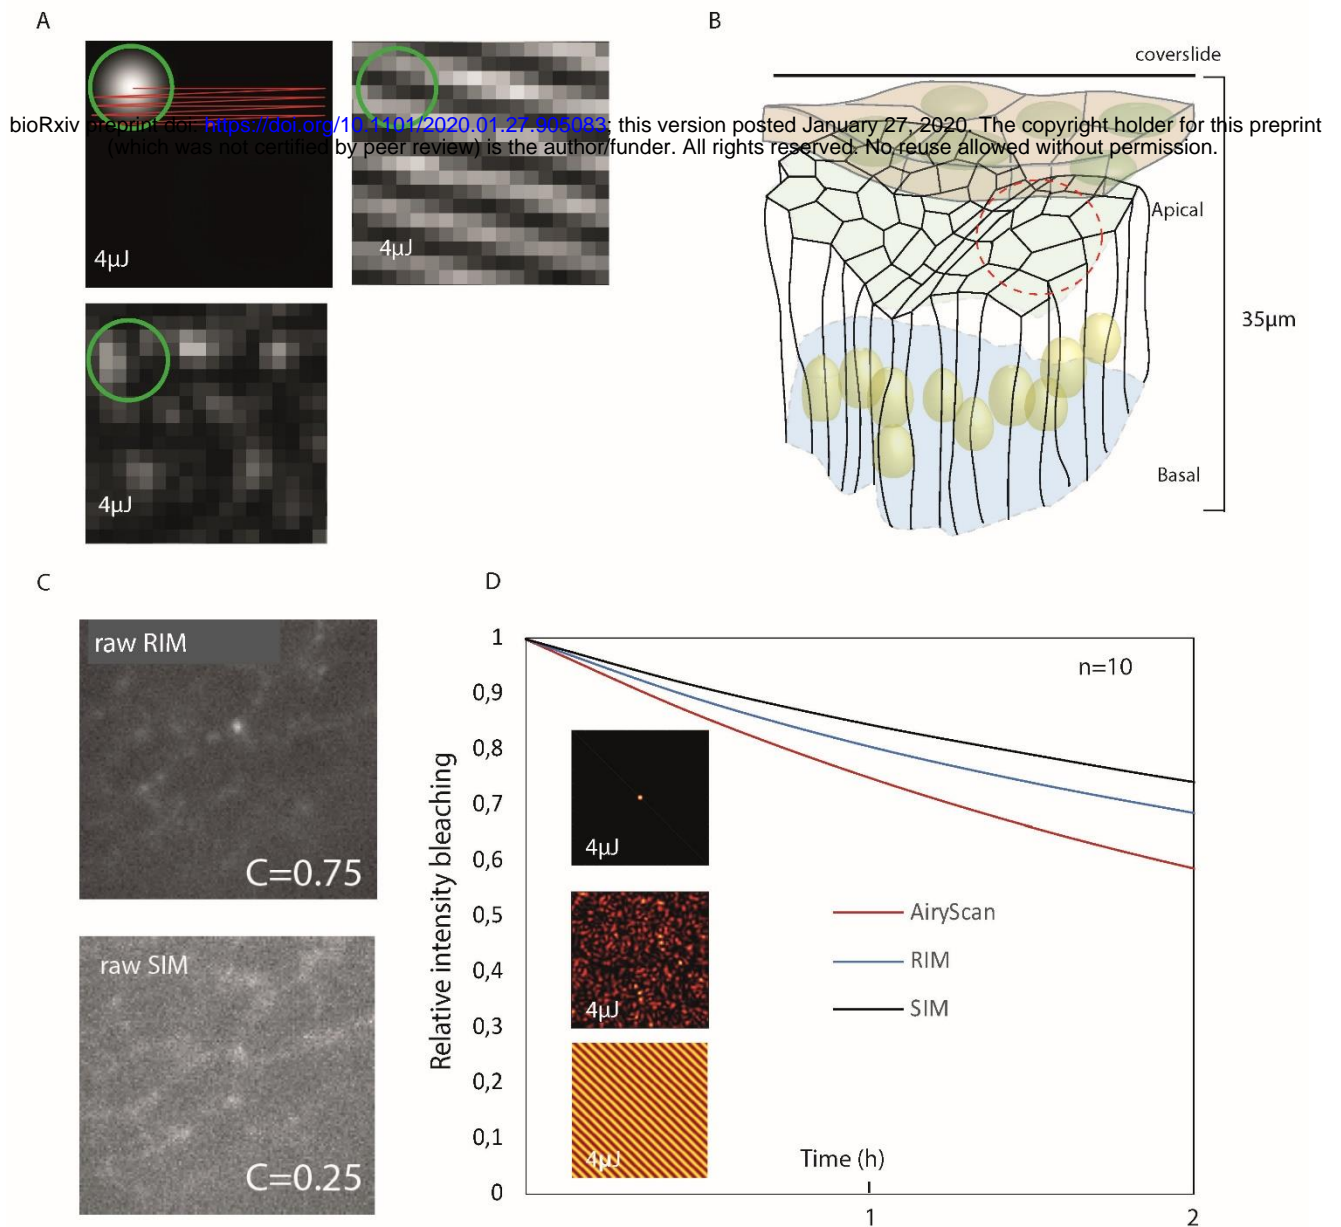

**Figure S4: Imaging of the Myosin network in *Drosophila* leg, bleaching and robustness to aberrations, related to Figure 4.**

(A) Illustration of the imaging conditions using AiryScan, RIM and SIM. In Airyscan (top left) the beam is focused at the object plane and translated. In SIM (top right) the illumination is a periodic grid which is translated and rotated. In RIM (bottom left) the illumination correspond to hundreds of different speckles. All the experiments are conducted by injecting the same total energy of 4  $\mu\text{J}$  per diffraction limited pixel, indicated by the green circle.

(B) Description of the bilayer epithelium of *Drosophila* leg. The peripodal epithelium layer in magenta introduces a first optical layer. The apical part of the second epithelium layer is the area imaged by AiryScan, SIM and RIM (indicated by the dashed red circle).

(C) One raw RIM image and one raw SIM image of the leg epithelium at 7  $\mu\text{m}$  depth. The periodic grid of SIM is not visible and the SIM image contrast  $C=(I_{\text{max}}-I_{\text{min}})/(I_{\text{max}}+I_{\text{min}})=0.25$  is smaller than that obtained by RIM,  $C=0.75$ . In this configuration, SIM reconstruction with SIMcheck ( Ball et al., 2015) fails.

(D) Decay of the mean fluorescence intensity (bleaching) as a function of time averaged over  $n=10$  different fields of view for the three imaging modalities, Airyscan, SIM and RIM.

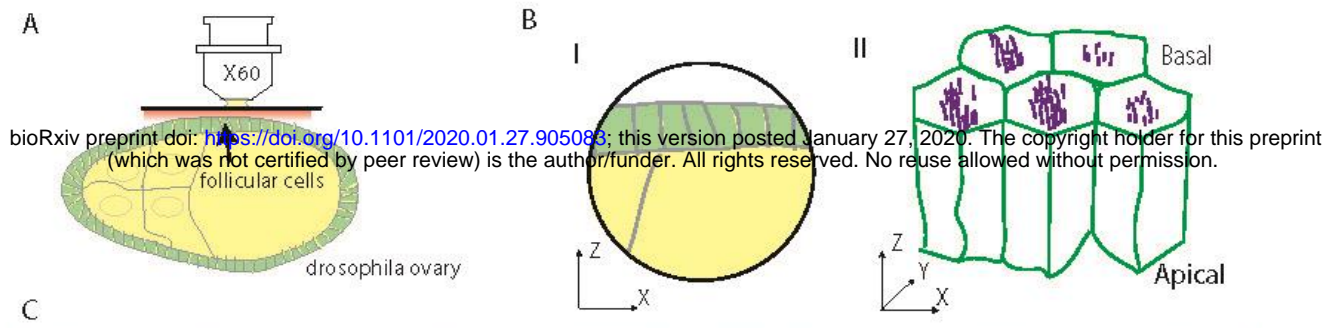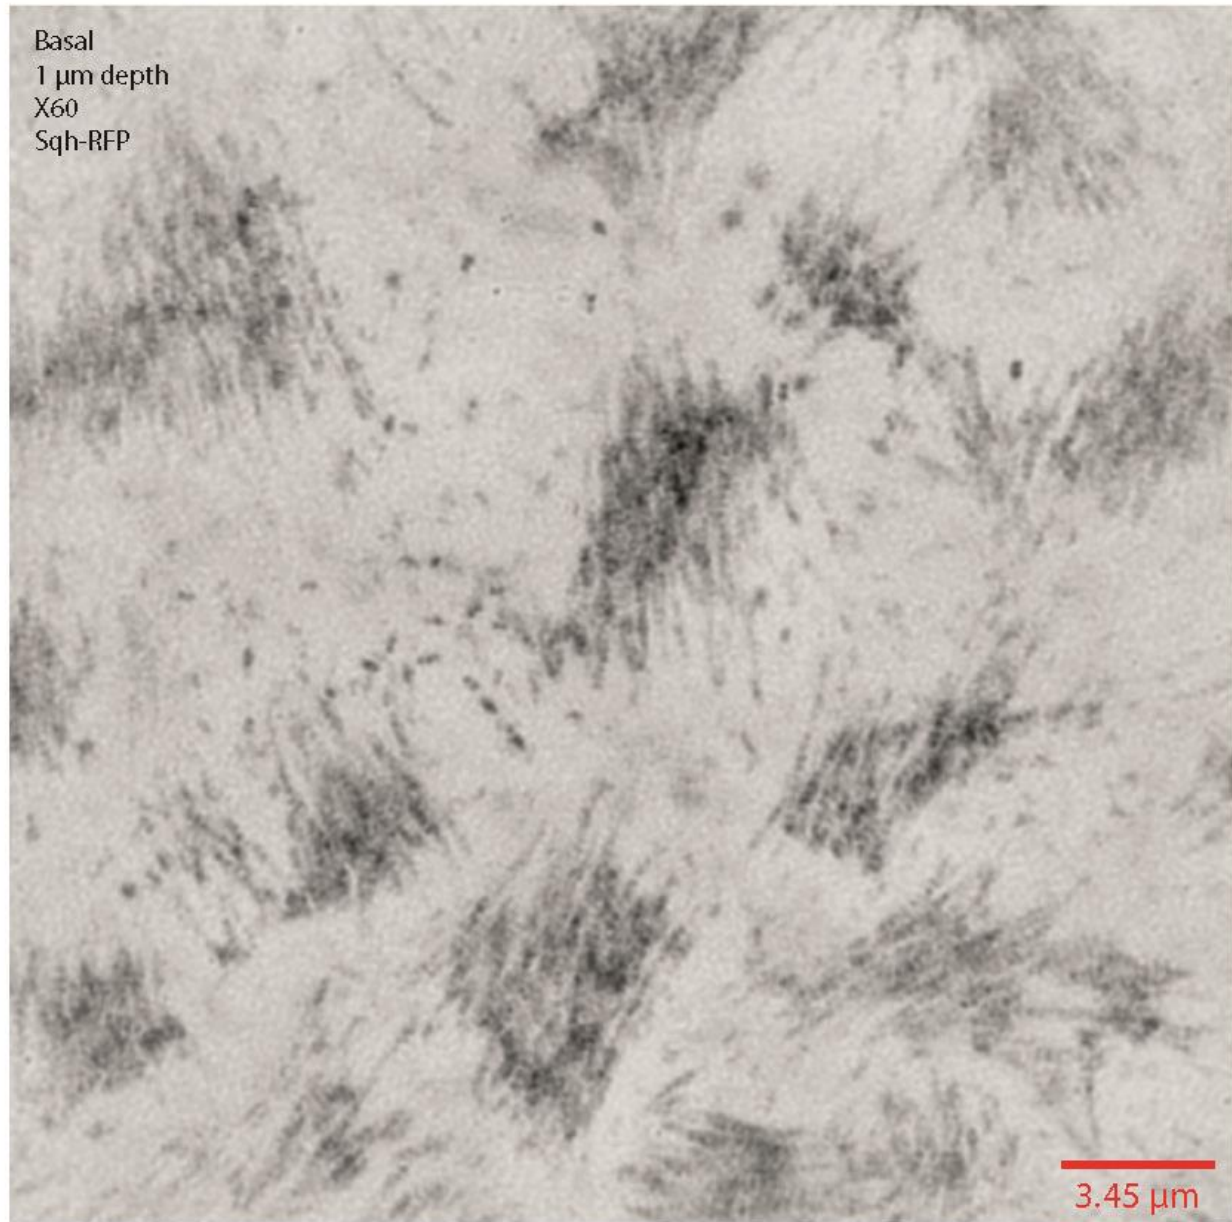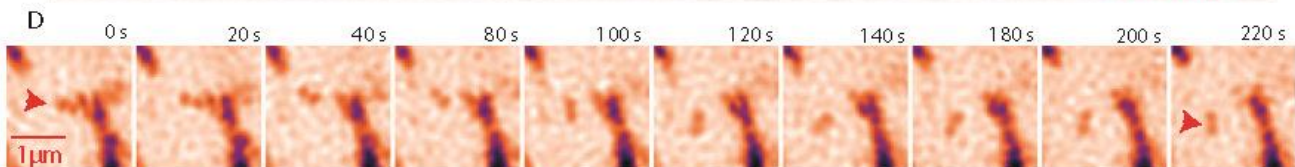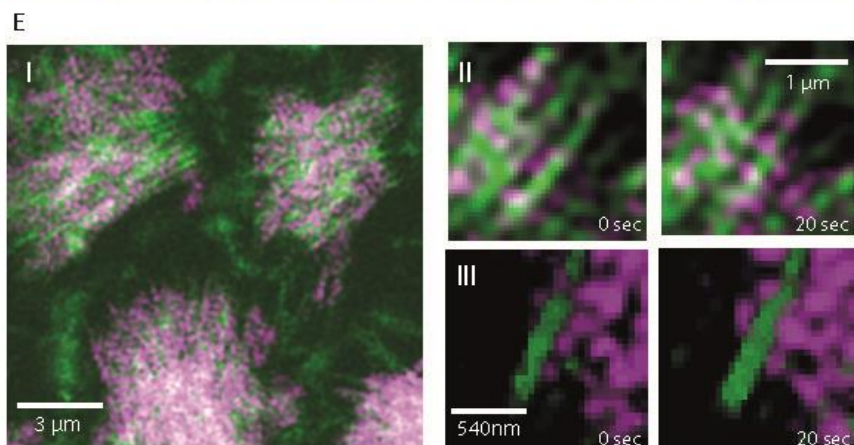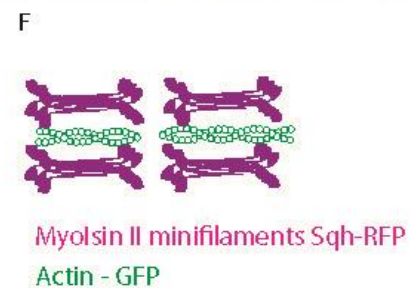

**Figure S5. RIM imaging in live Drosophila ovary, related to Figure 5 and Figure 6.**

- (A) Experimental conditions during acquisition. The imaged plane lays about one micron deep inside the ovary.
- (B) (I) Schematical representation of follicular epithelial cells (FEC) of Drosophila egg chamber at stage 9. (II) At the basal pole of FEC, facing the extracellular matrix, Myosin II filaments are organized in parallel bundles lying along actin filaments.
- (C) Snapshot of a 3D RIM widefield view of the parallel bundles of Myosin II at the basal plane of live follicular epithelial cells (see Movie S8).
- (D) Zoom on the rotatory movement of a single Myosin II minifilament at the basal plane of follicular epithelial cells (red arrowhead).
- (E) (I) Two-color live-imaging of Myosin II-RFP (Sqh-RFP, magenta) together with Actin labelled with the Actin Binding Domain of Utrophin tagged with GFP (Utrophin-ABD-GFP, green) at the basal surface of follicular epithelial cells discloses the alignment of Myosin II minifilaments with actin filaments, cartooned in (F), showing the ability to monitor the dynamics of two fluorescent probes with a high spatio-temporal resolution. (II) and (III) High magnifications.

**Movie Captions:**

Movie S1: Comparison between the raw images in dSTORM and RIM, related to Figure 1.

Movie S2: 3D RIM reconstruction of fixed Vimentin filaments, related to Figure 2.

Movie S3: Dynamics of F-actin podosomes, related to Figure 3.

Movie S4: Dynamics of PCNA, related to Figure 3.

Movie S5: 3D RIM reconstruction of *S. pombe* kinetochores compared to the 3D widefield image, related to Figure 3.

Movie S6: Comparison of RIM and SIM raw images in the fixed *Drosophila* leg, related to Figure 4.

Movie S7: Comparison of the RIM and Airyscan reconstructed images in the fixed *Drosophila* leg, related to Figure 4.

Movie S8: Dynamics of the live myosin network in the *Drosophila* leg (at the apical and basal plane), notum (apical plane and SOP) and egg chamber (basal plane), related to Figure 5, S5 and 6.

Movie S9: Migration of the border cells in *Drosophila* ovary, comparison between RIM and widefield images, related to Figure 7.
